# Supplementary material for: Proportion-based normalizations outperform compositional data transformations in machine learning applications
Source: PubMed Central journal article supplement (PMC10913632; doi:10.1186/s40168-023-01747-z), 2024-03-05

orig\_ref

Zeller Silva LTP

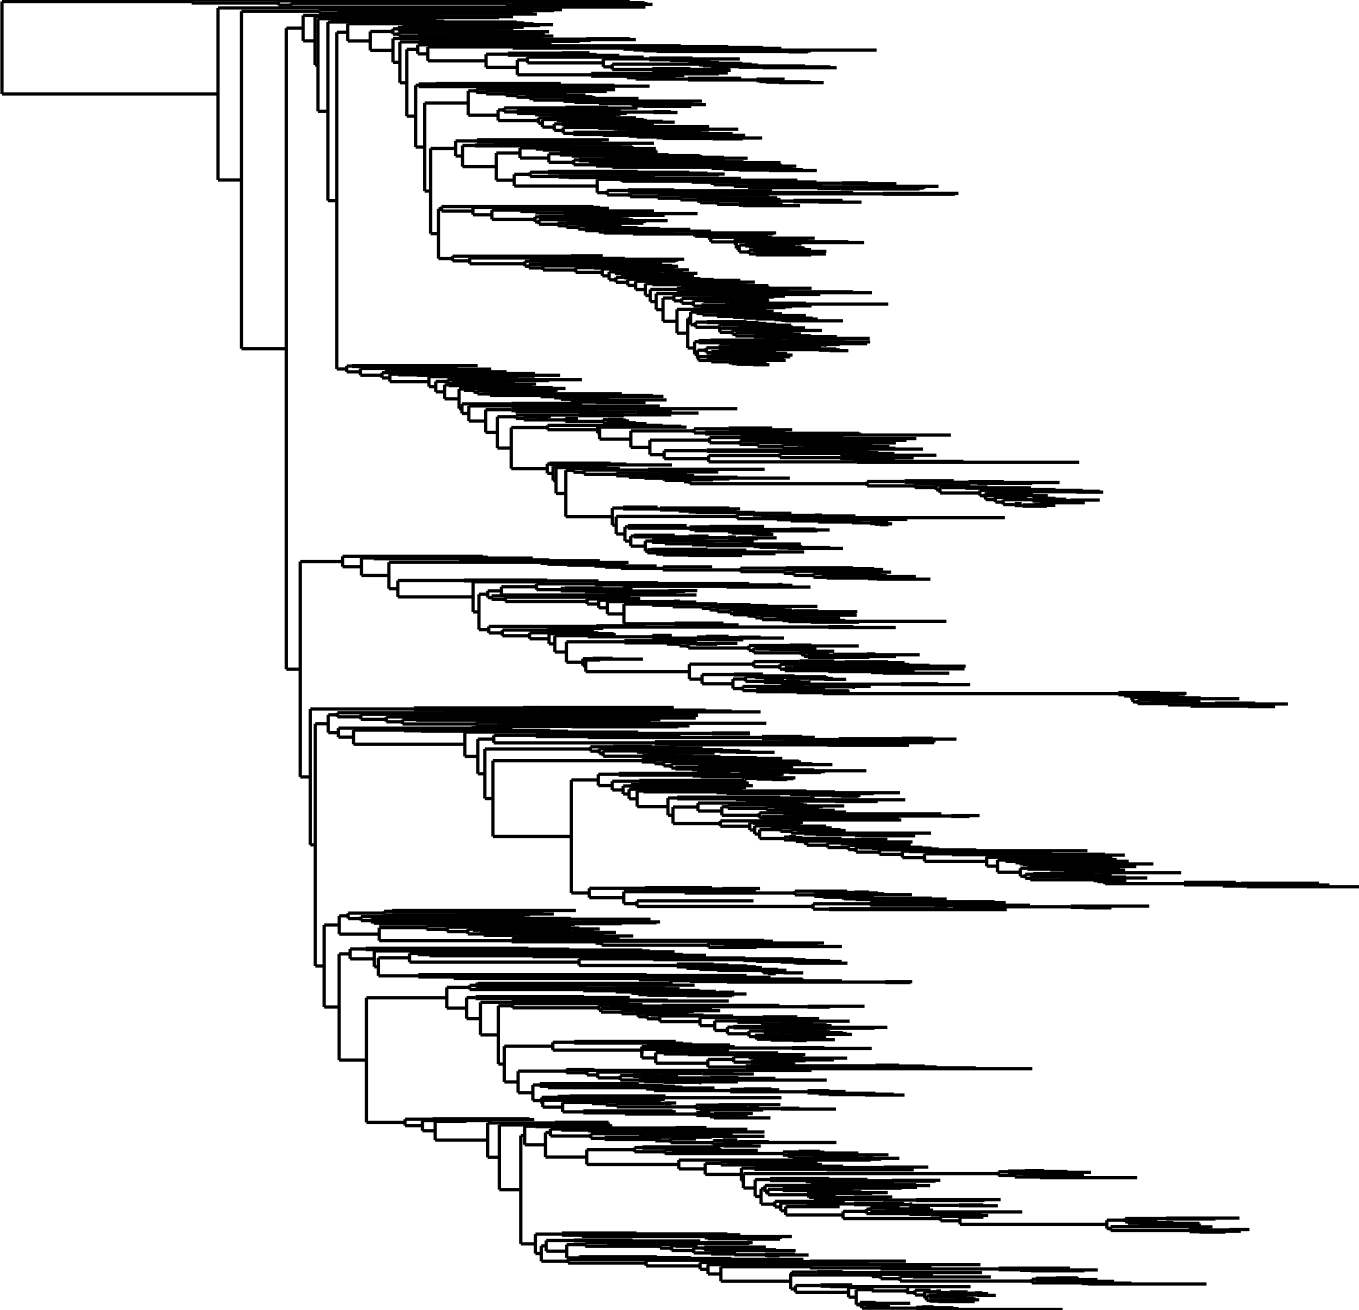

cln\_ref

# Zeller filtered Silva LTP

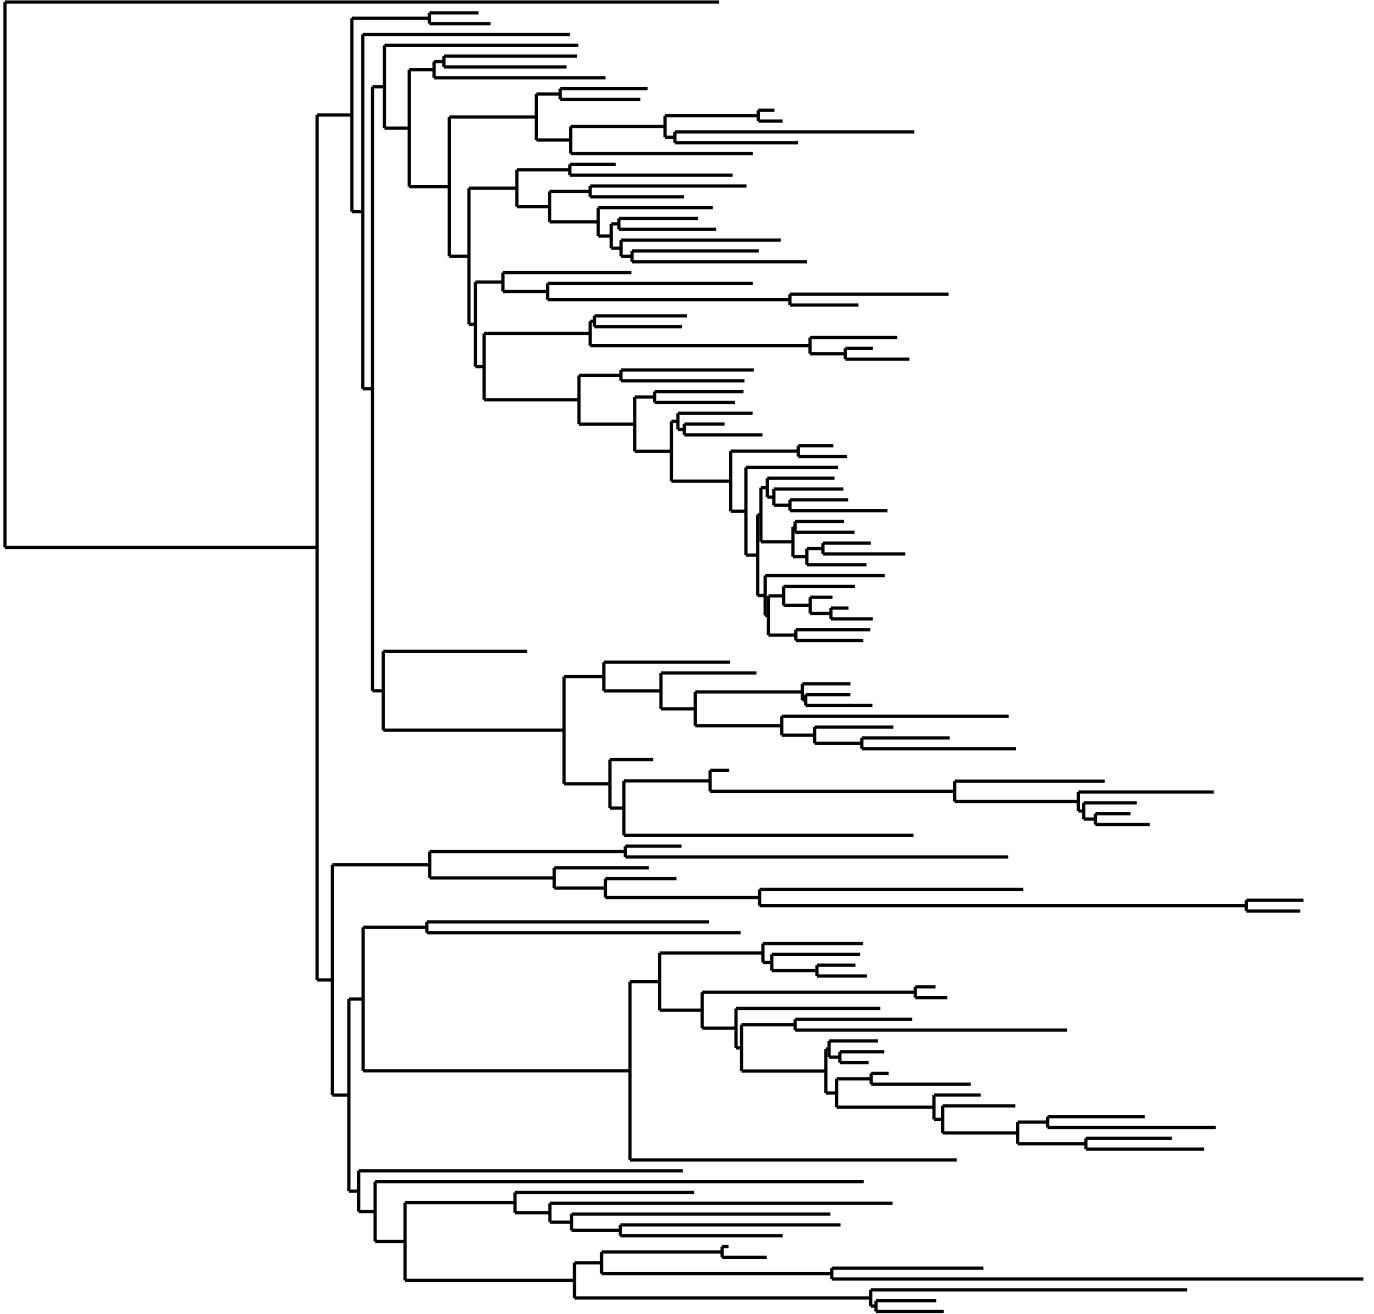

orig\_upgma

Zeller UPGMA

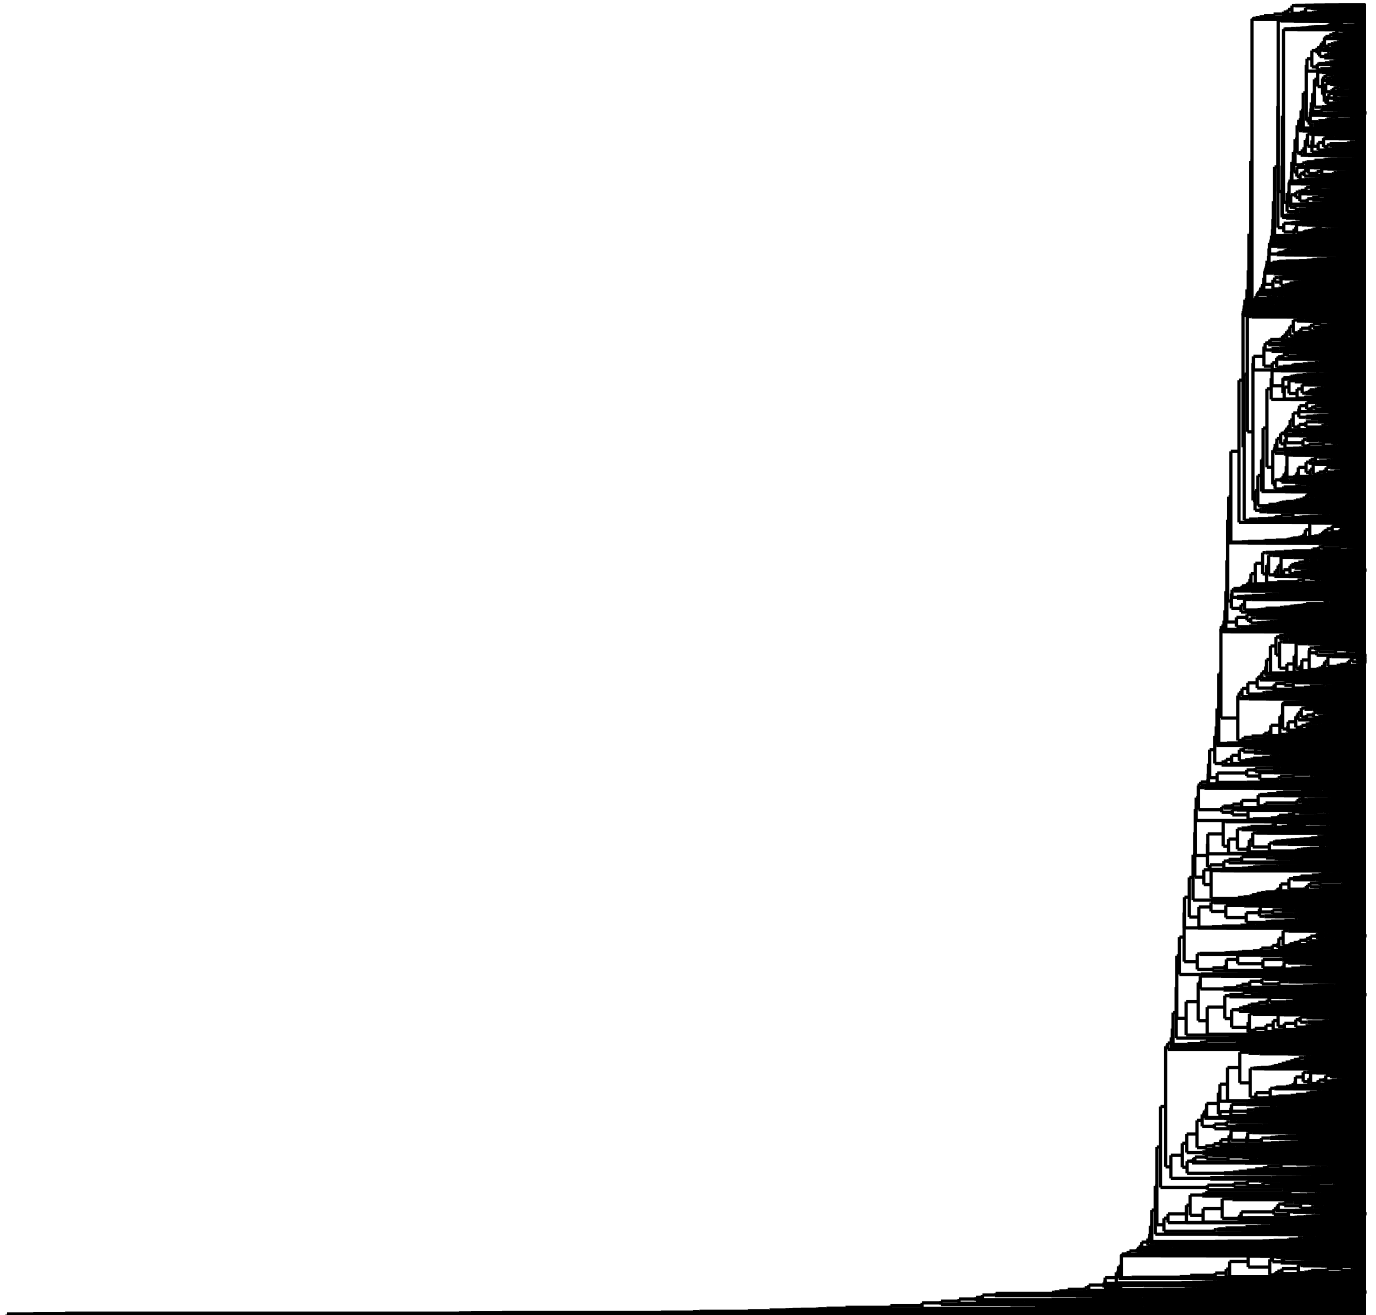

cln\_upgma

# Zeller Filtered UPGMA

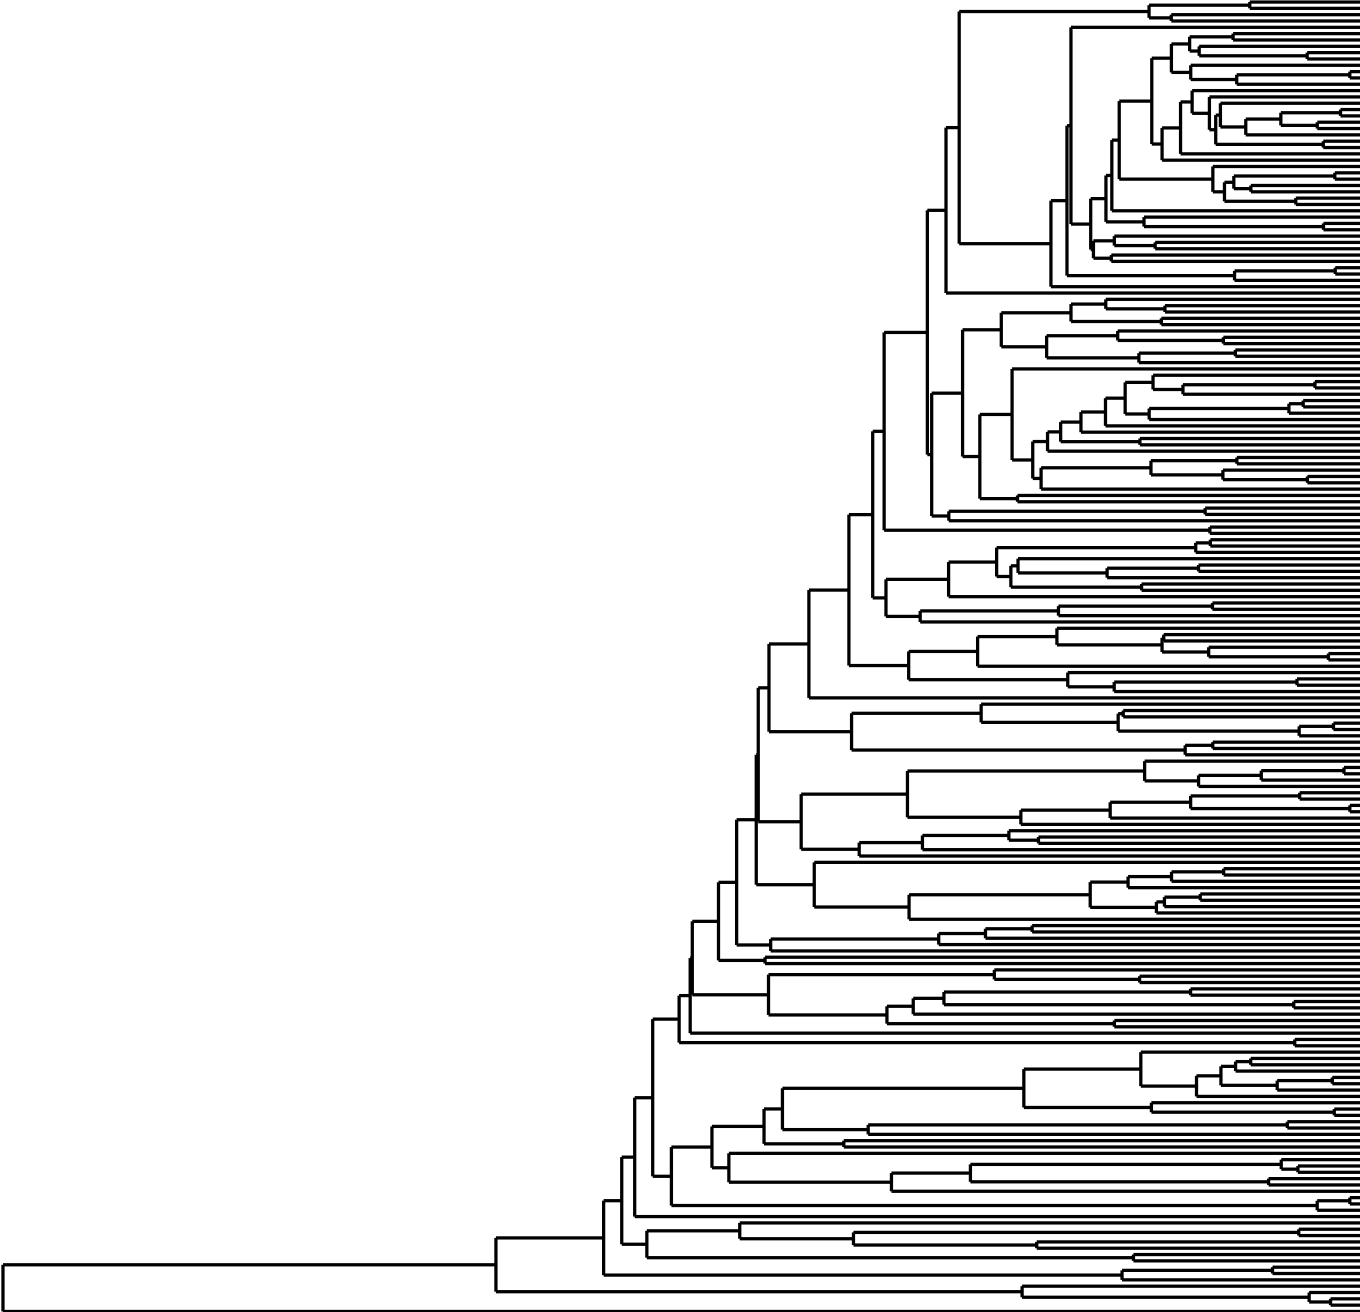

orig\_iqtree

Zeller IQTREE

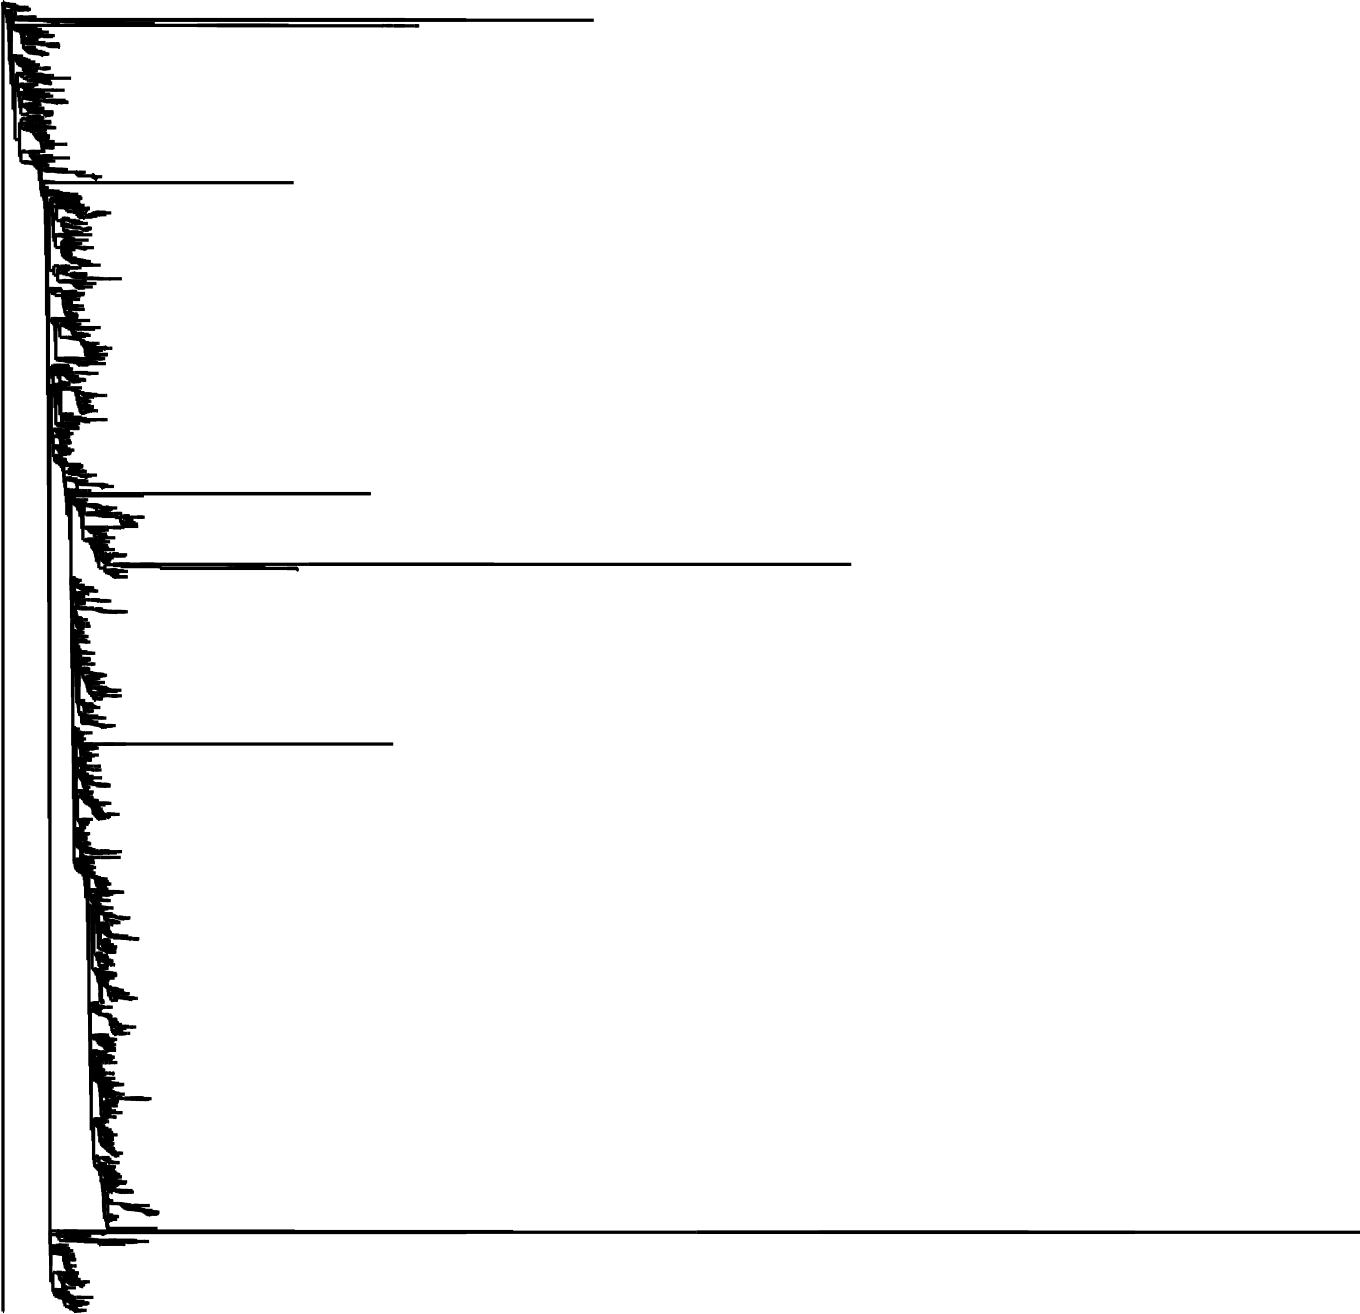

cln\_iqtree

# Zeller filtered IQTREE

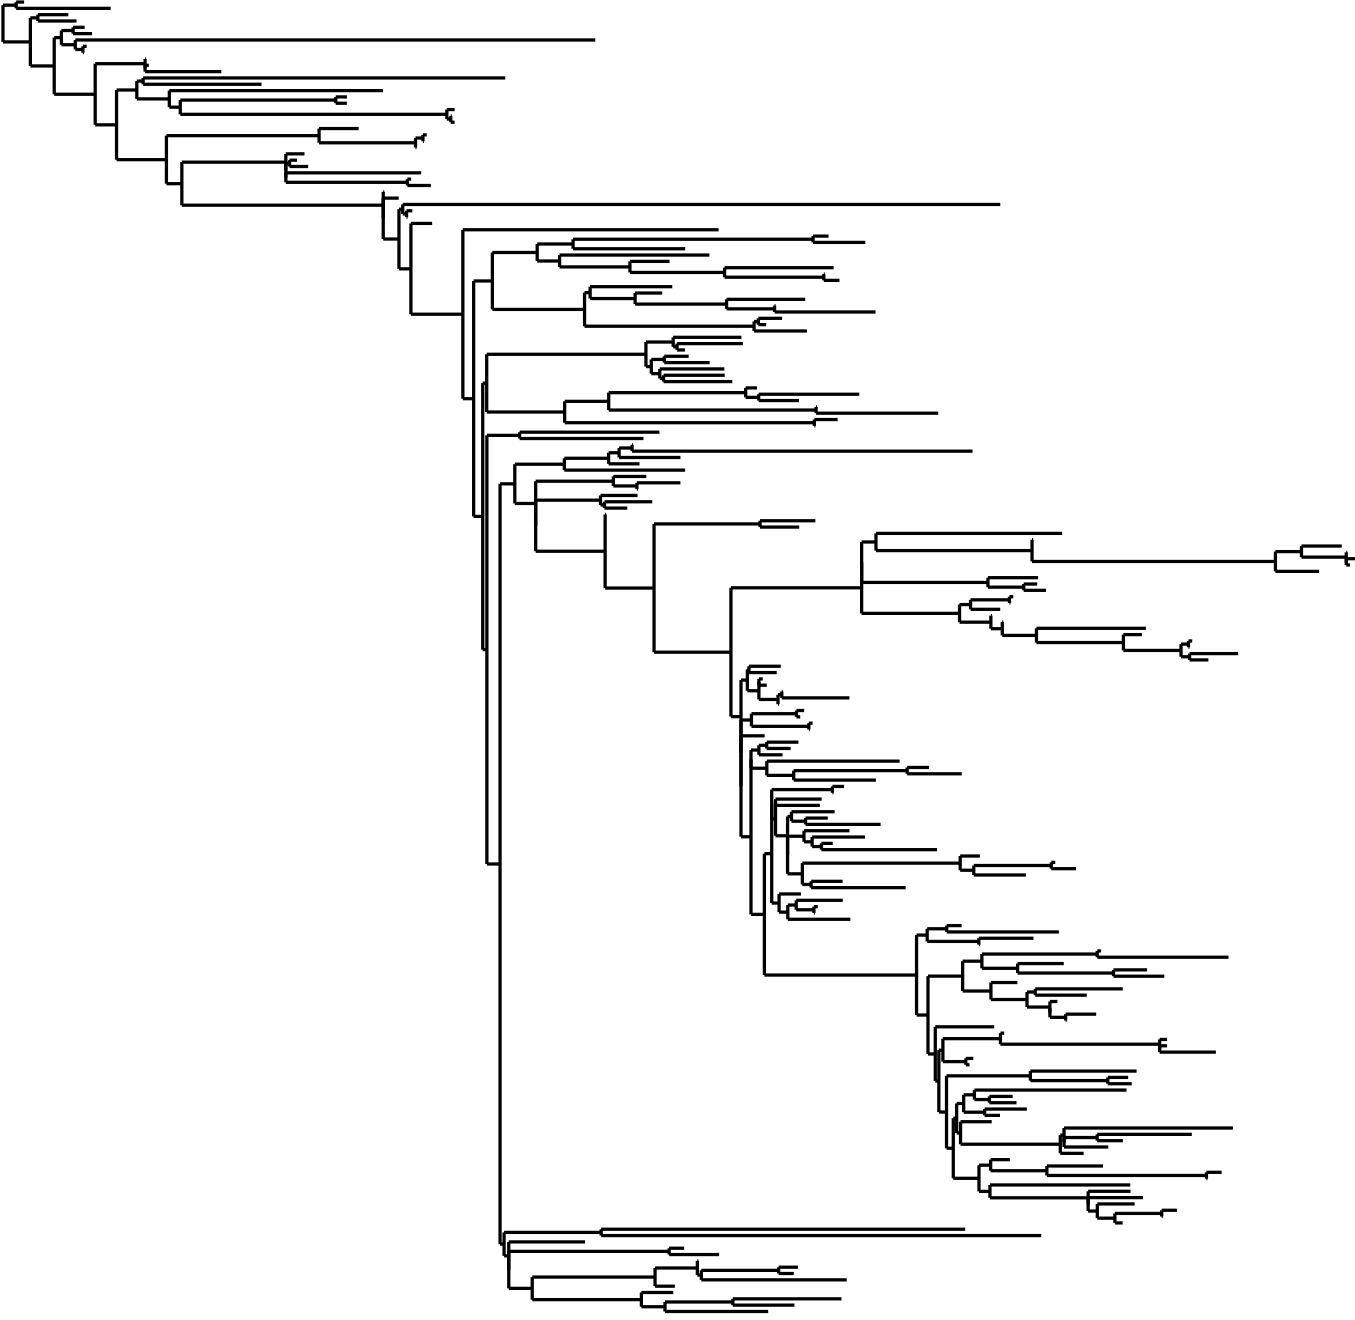

orig\_ref

Jones Silva LTP

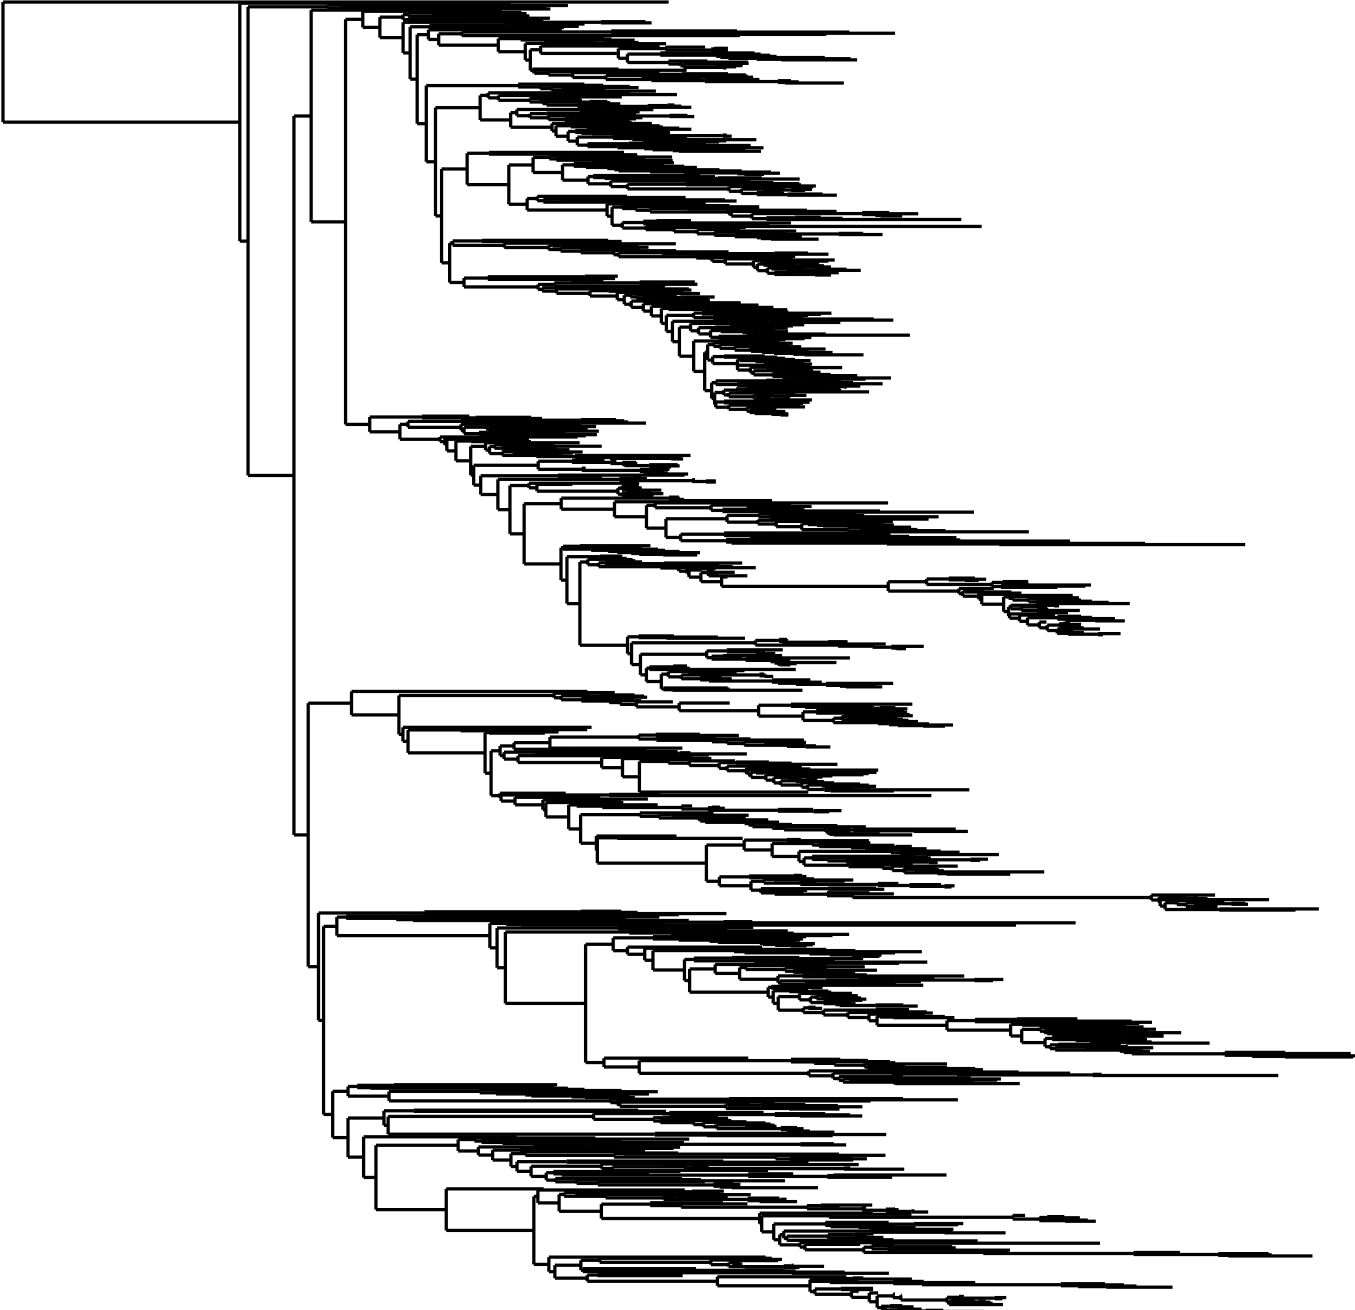

cln\_ref

Jones filtered Silva LTP

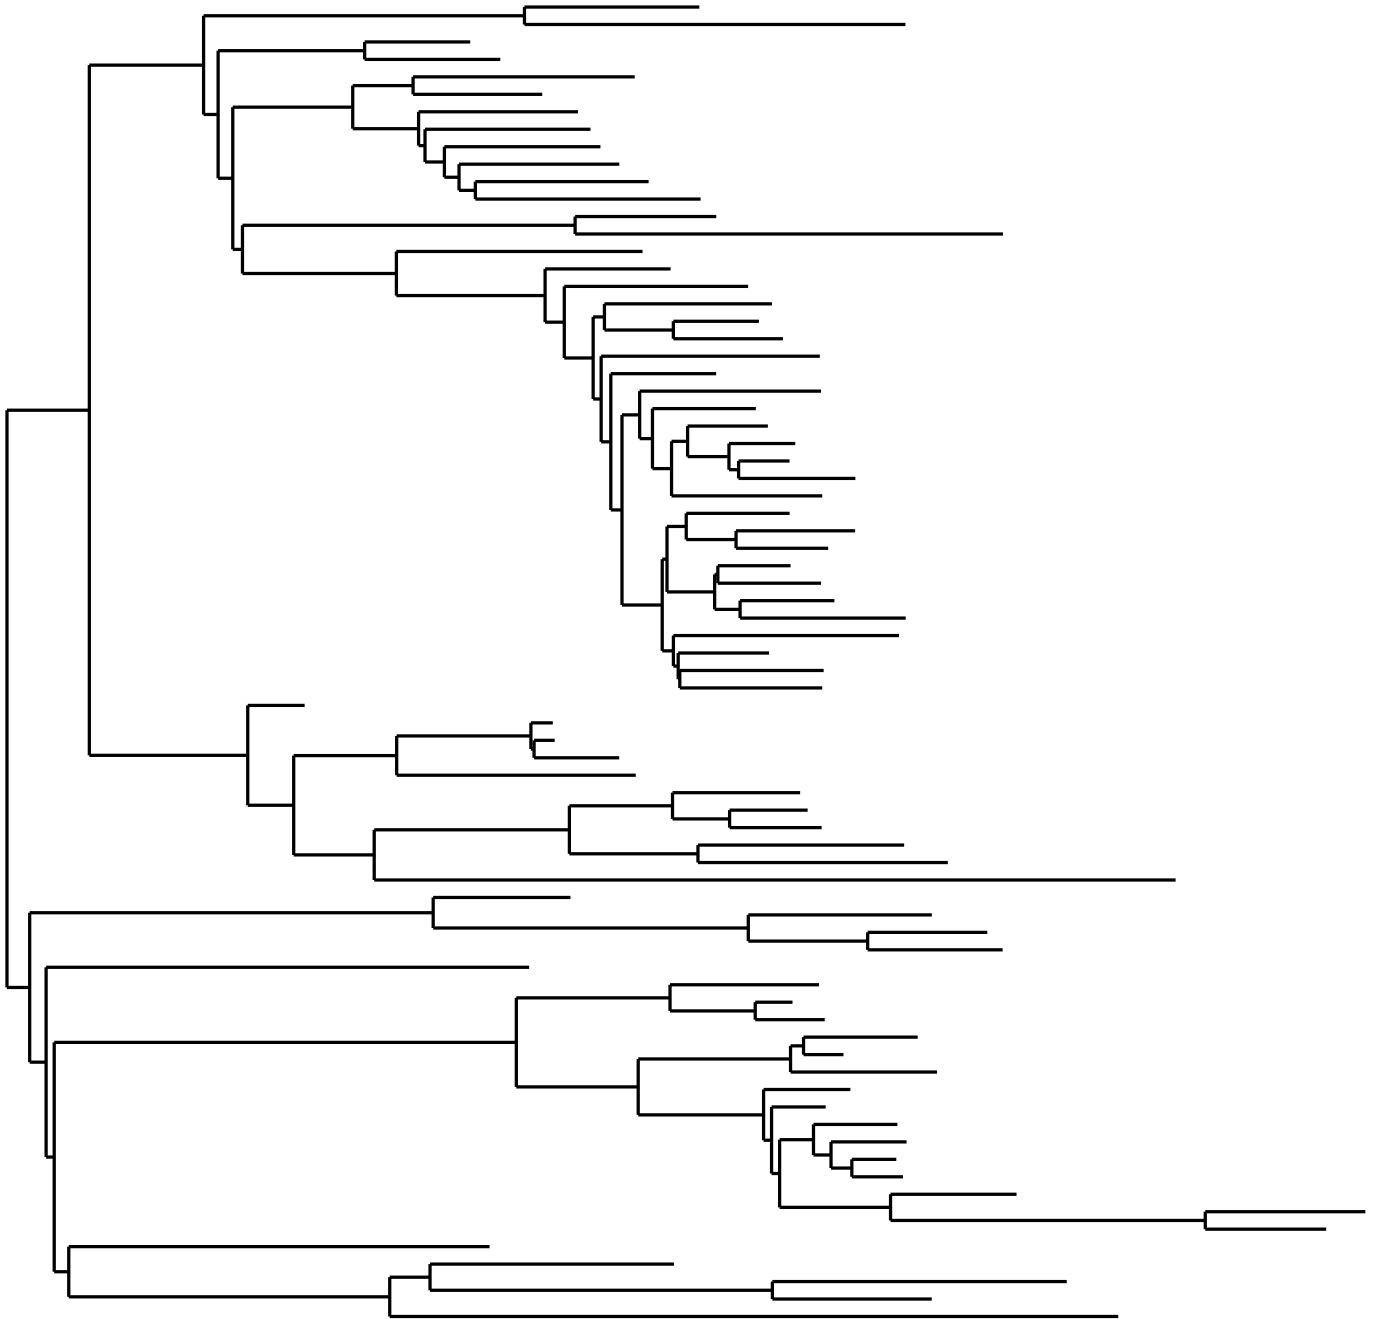



orig\_upgma

Jones UPGMA

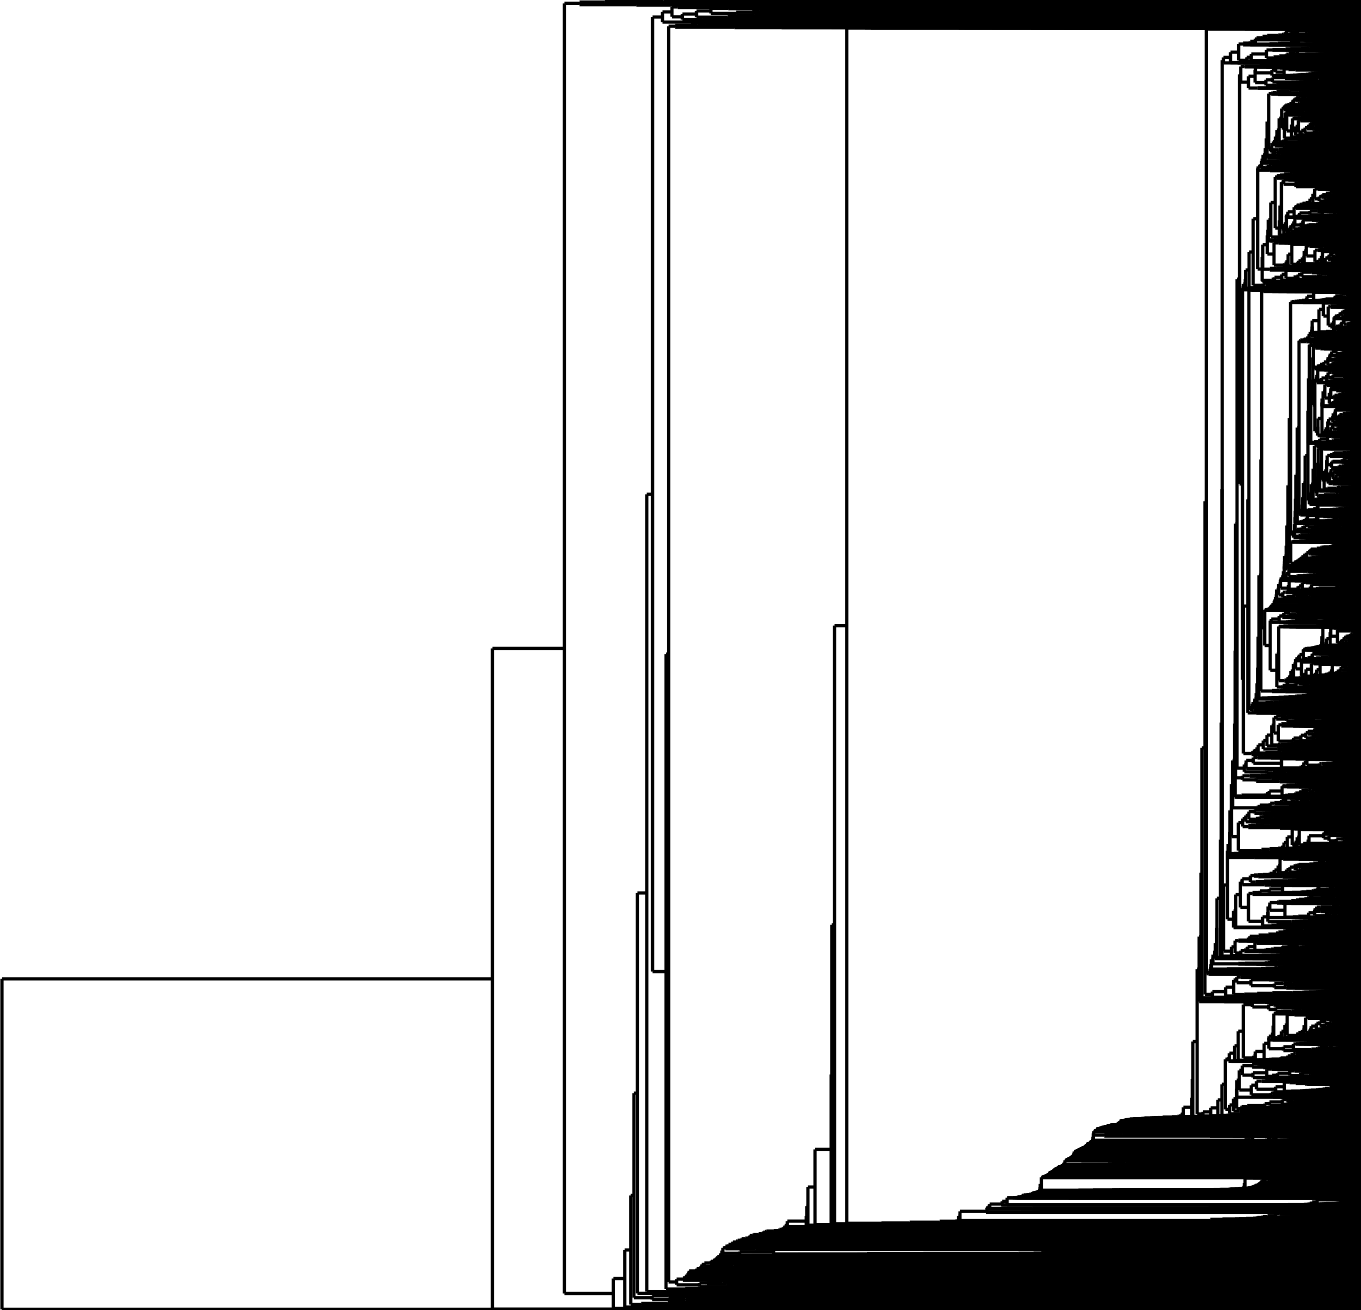

cln\_upgma

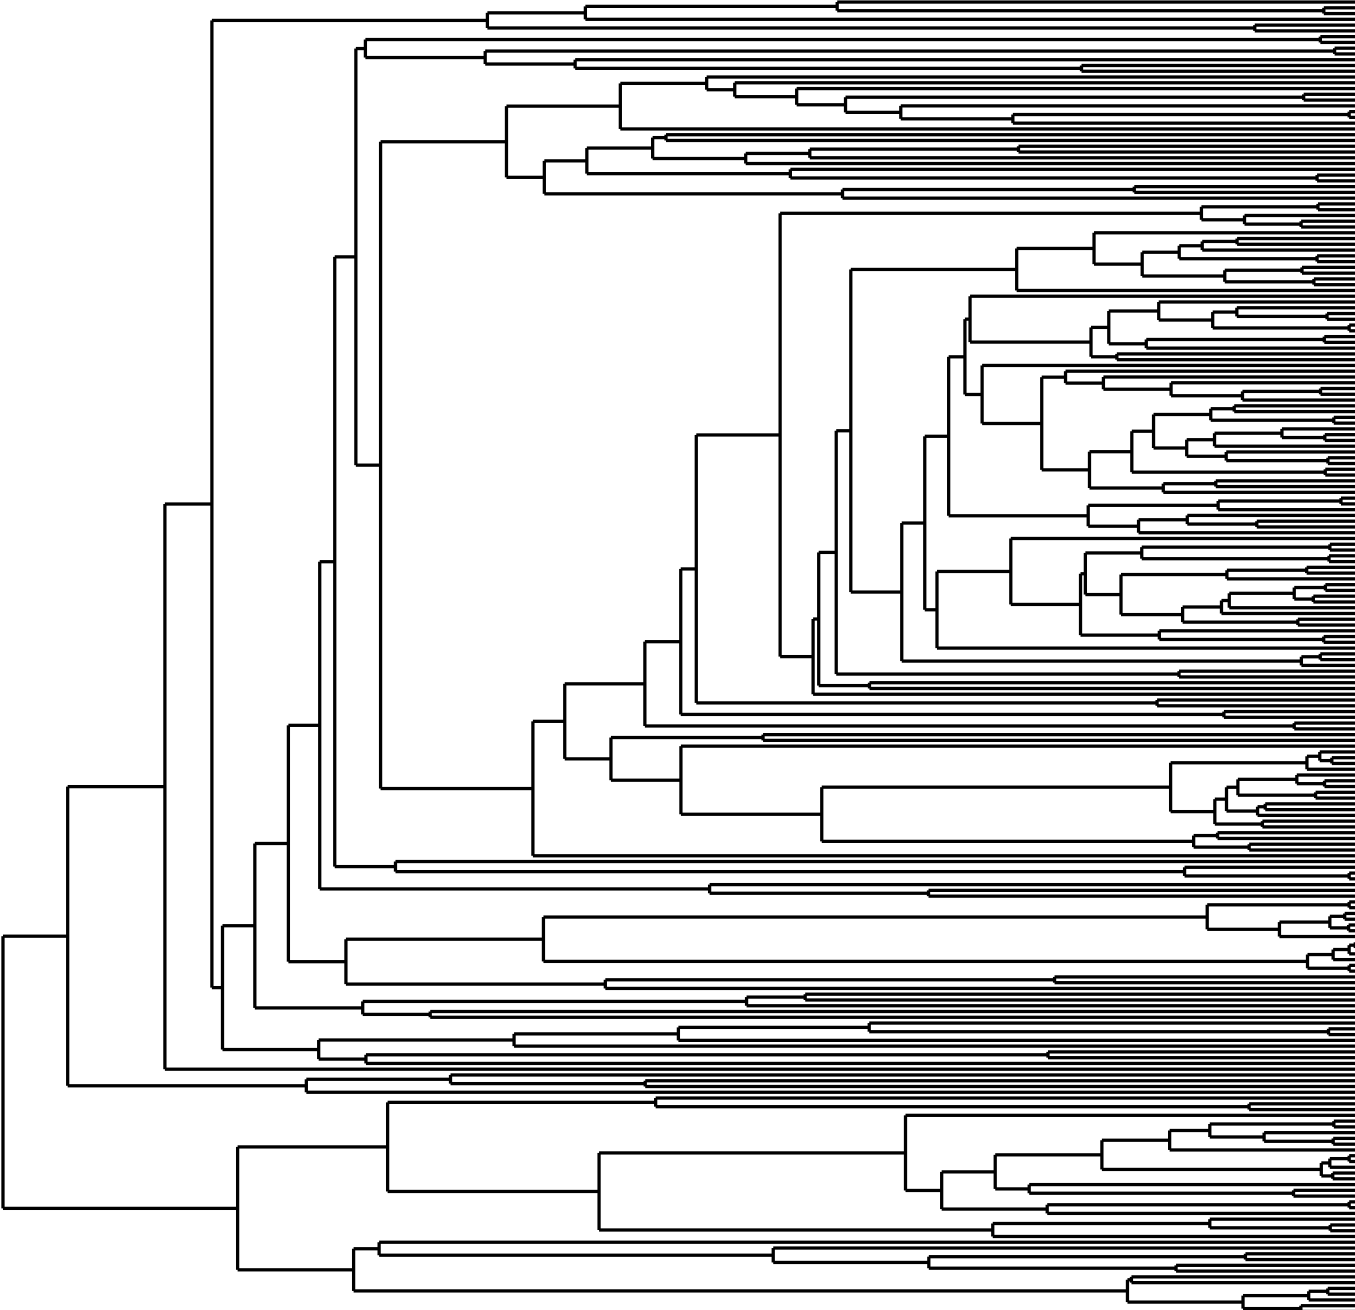

orig\_iqtree

Jones IQTREE

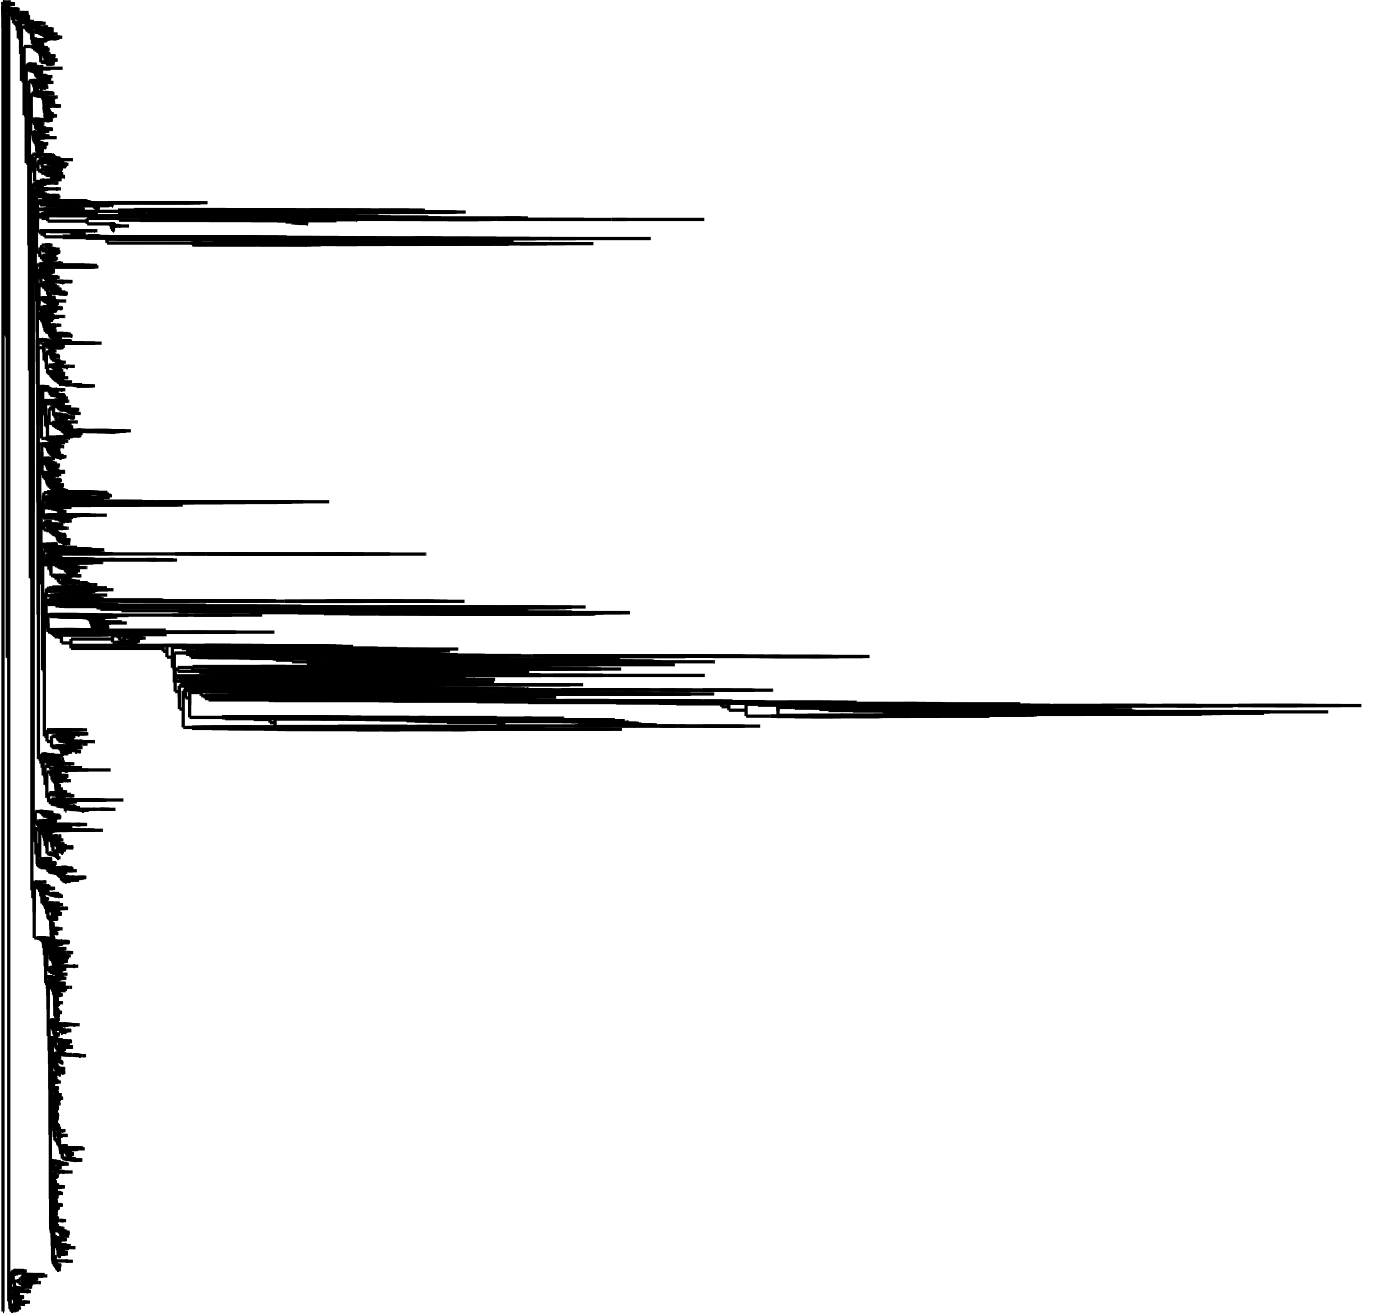

cln\_iqtree

# Jones filtered IQTREE

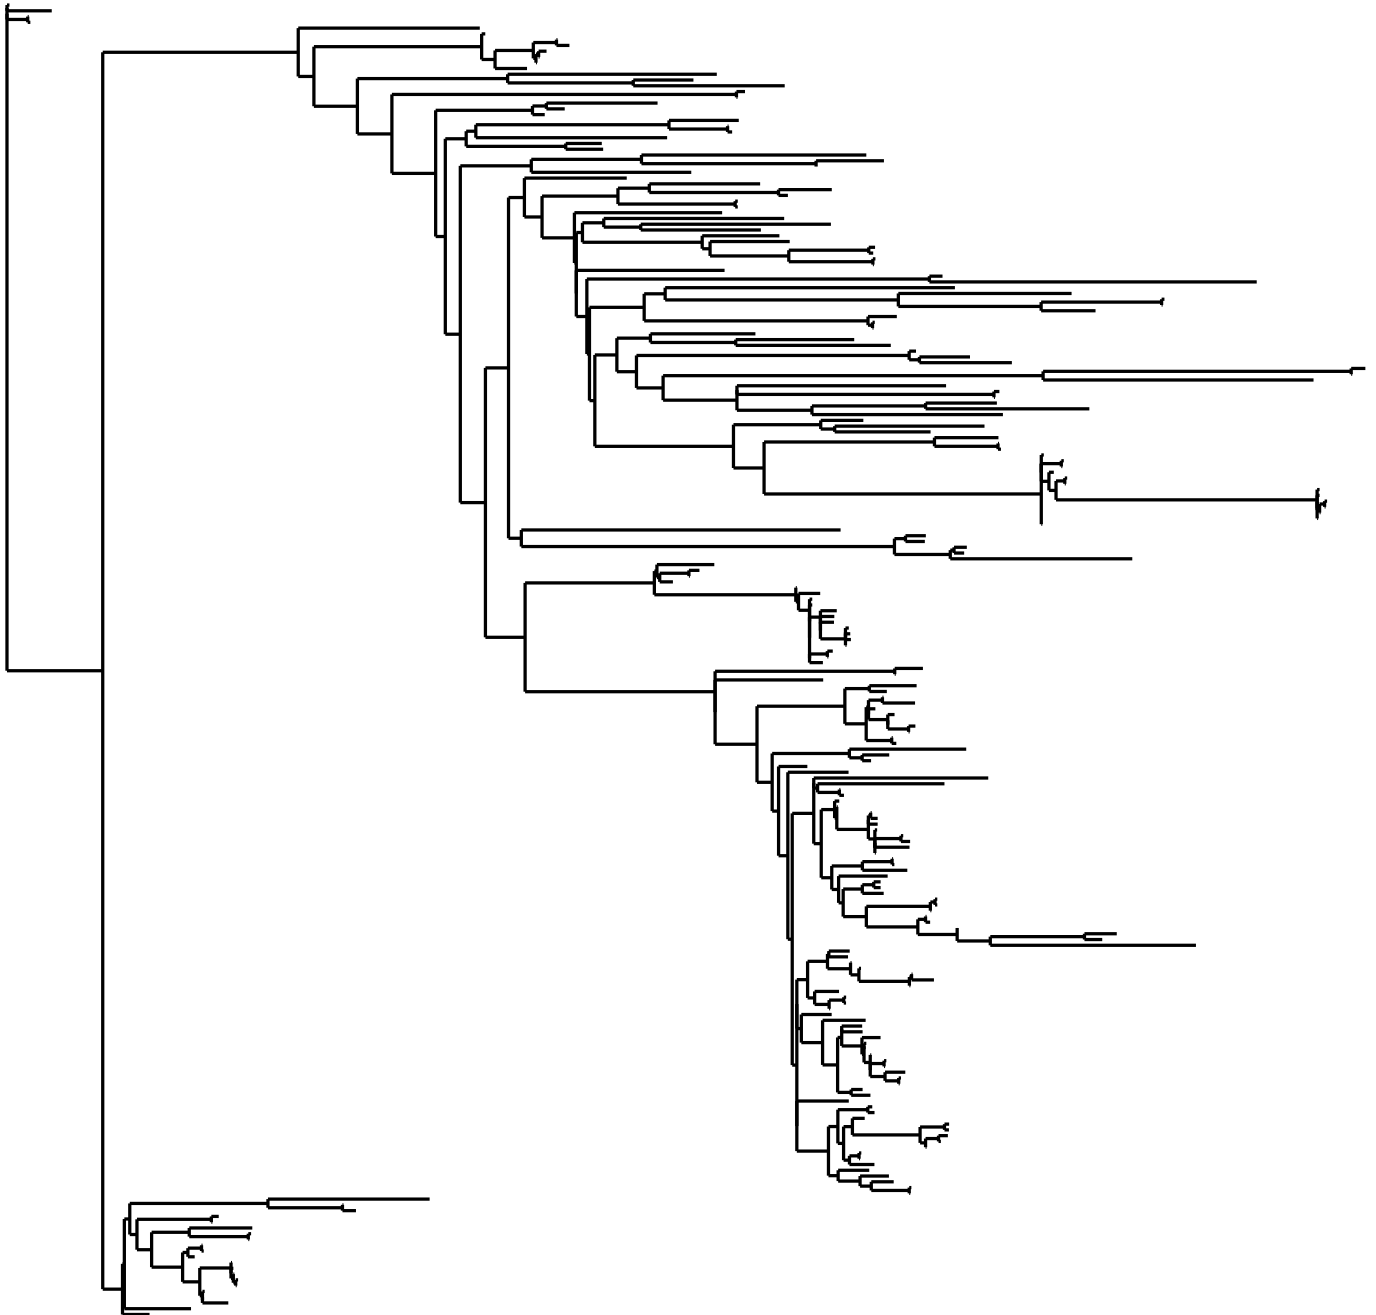

orig\_ref

Vangay Silva LTP

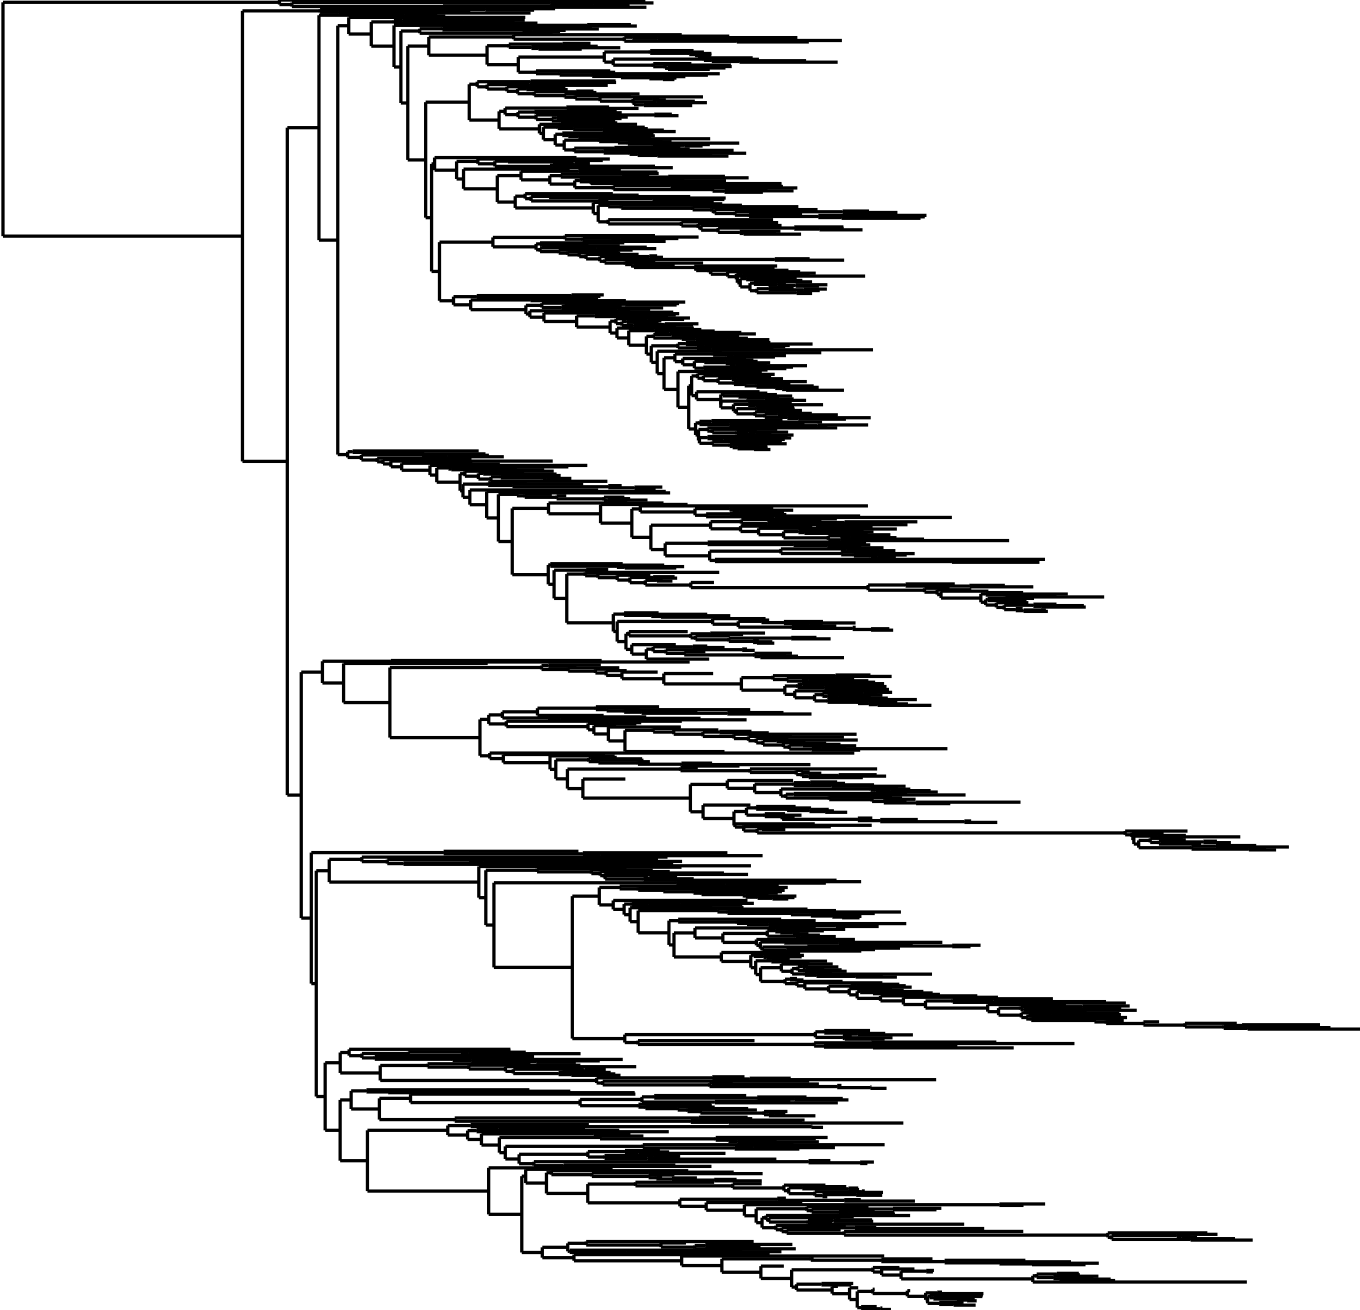

cln\_ref

# Vangay filtered Silva LTP

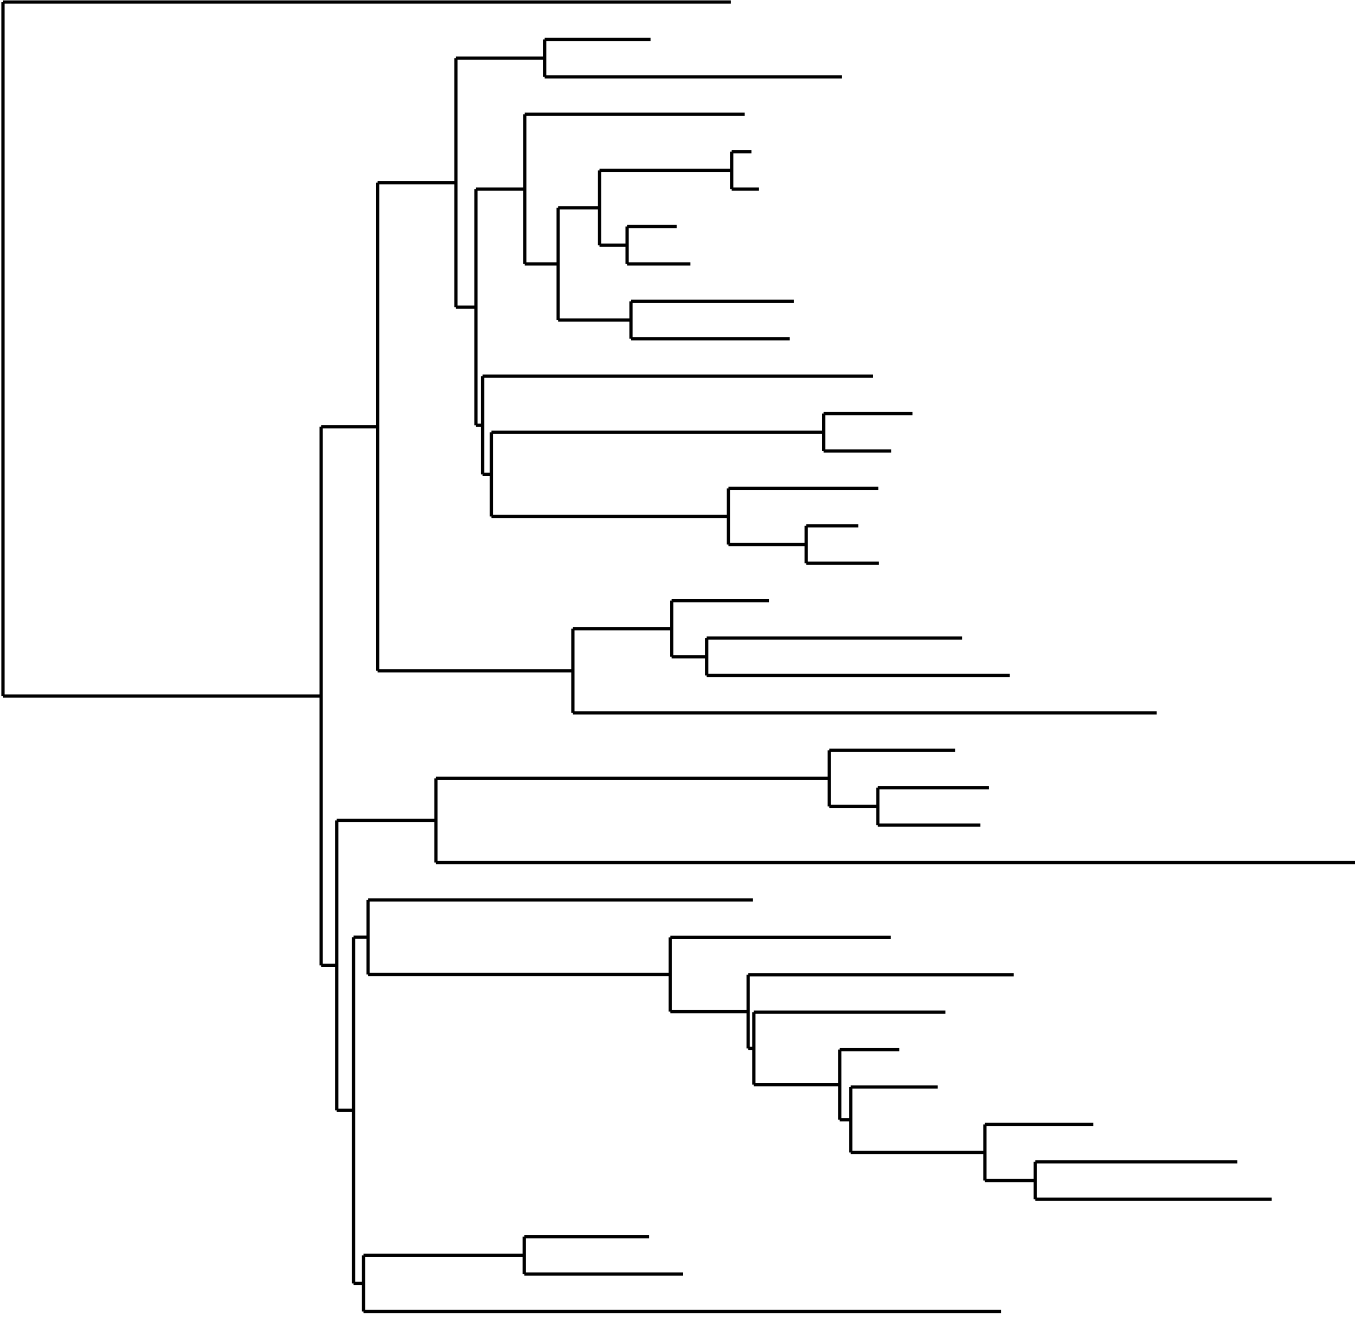

orig\_upgma

Vangay filtered UPGMA

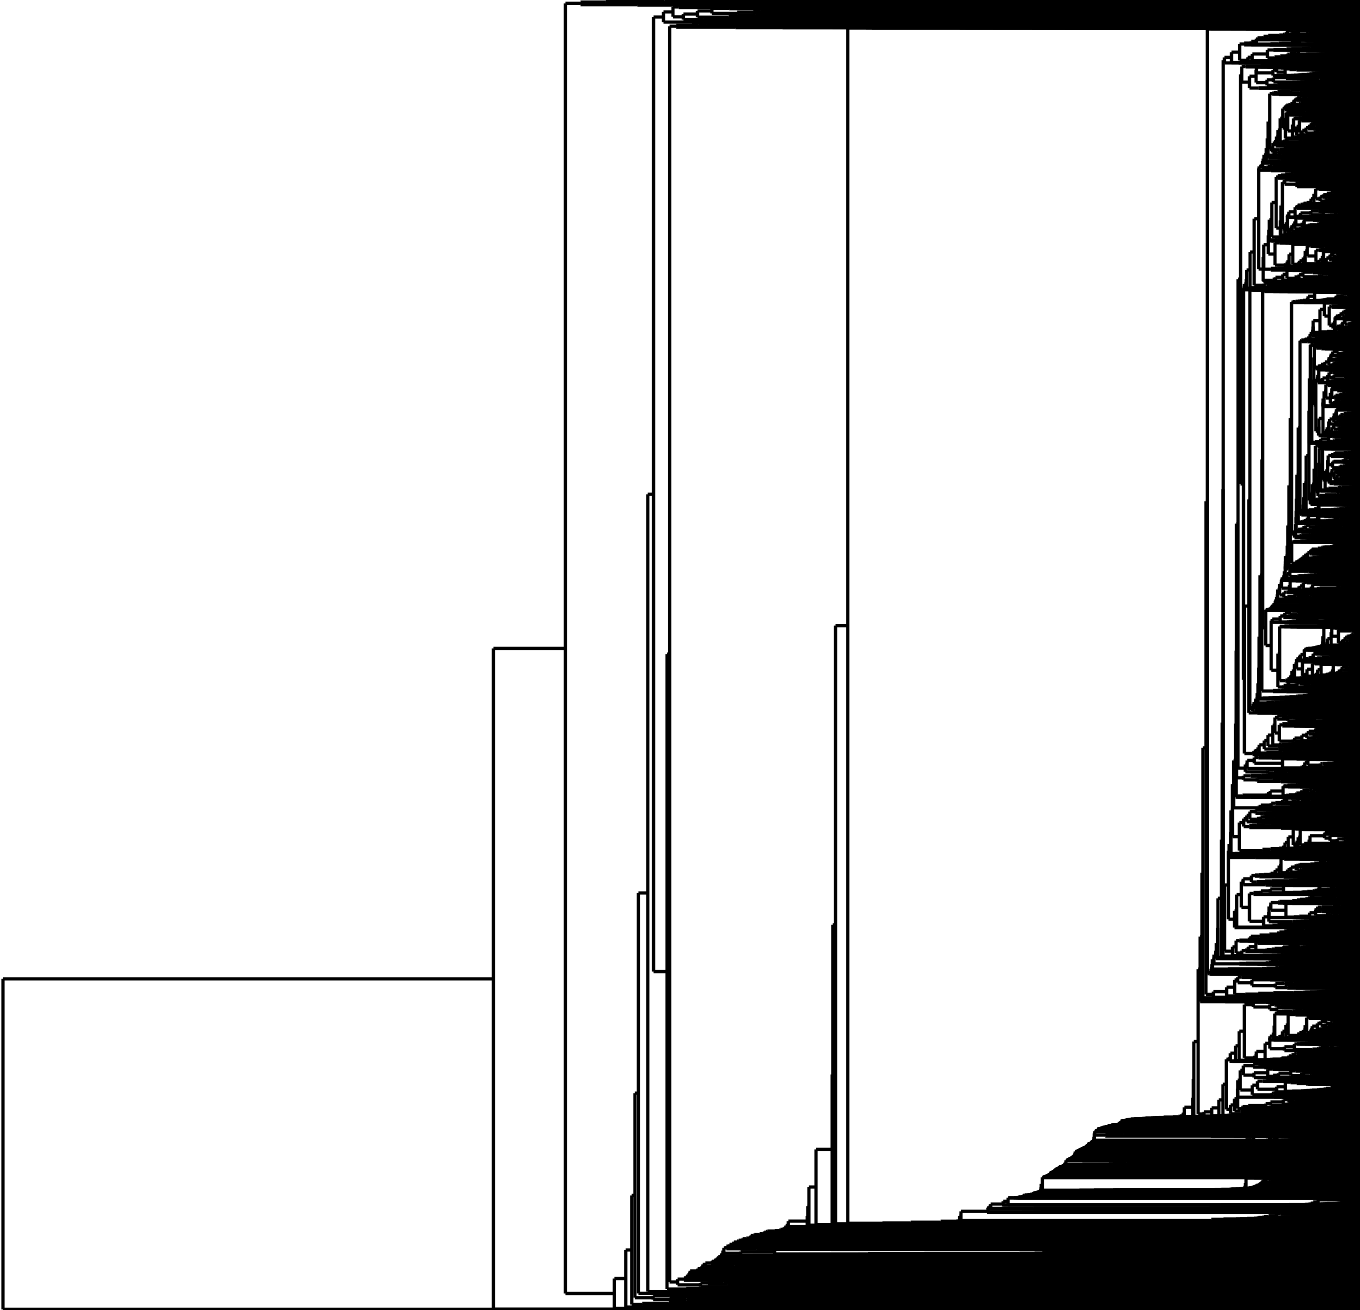

cln\_upgma

# Vangay filtered UPGMA





orig\_iqtree

Vangay filtered IQTREE

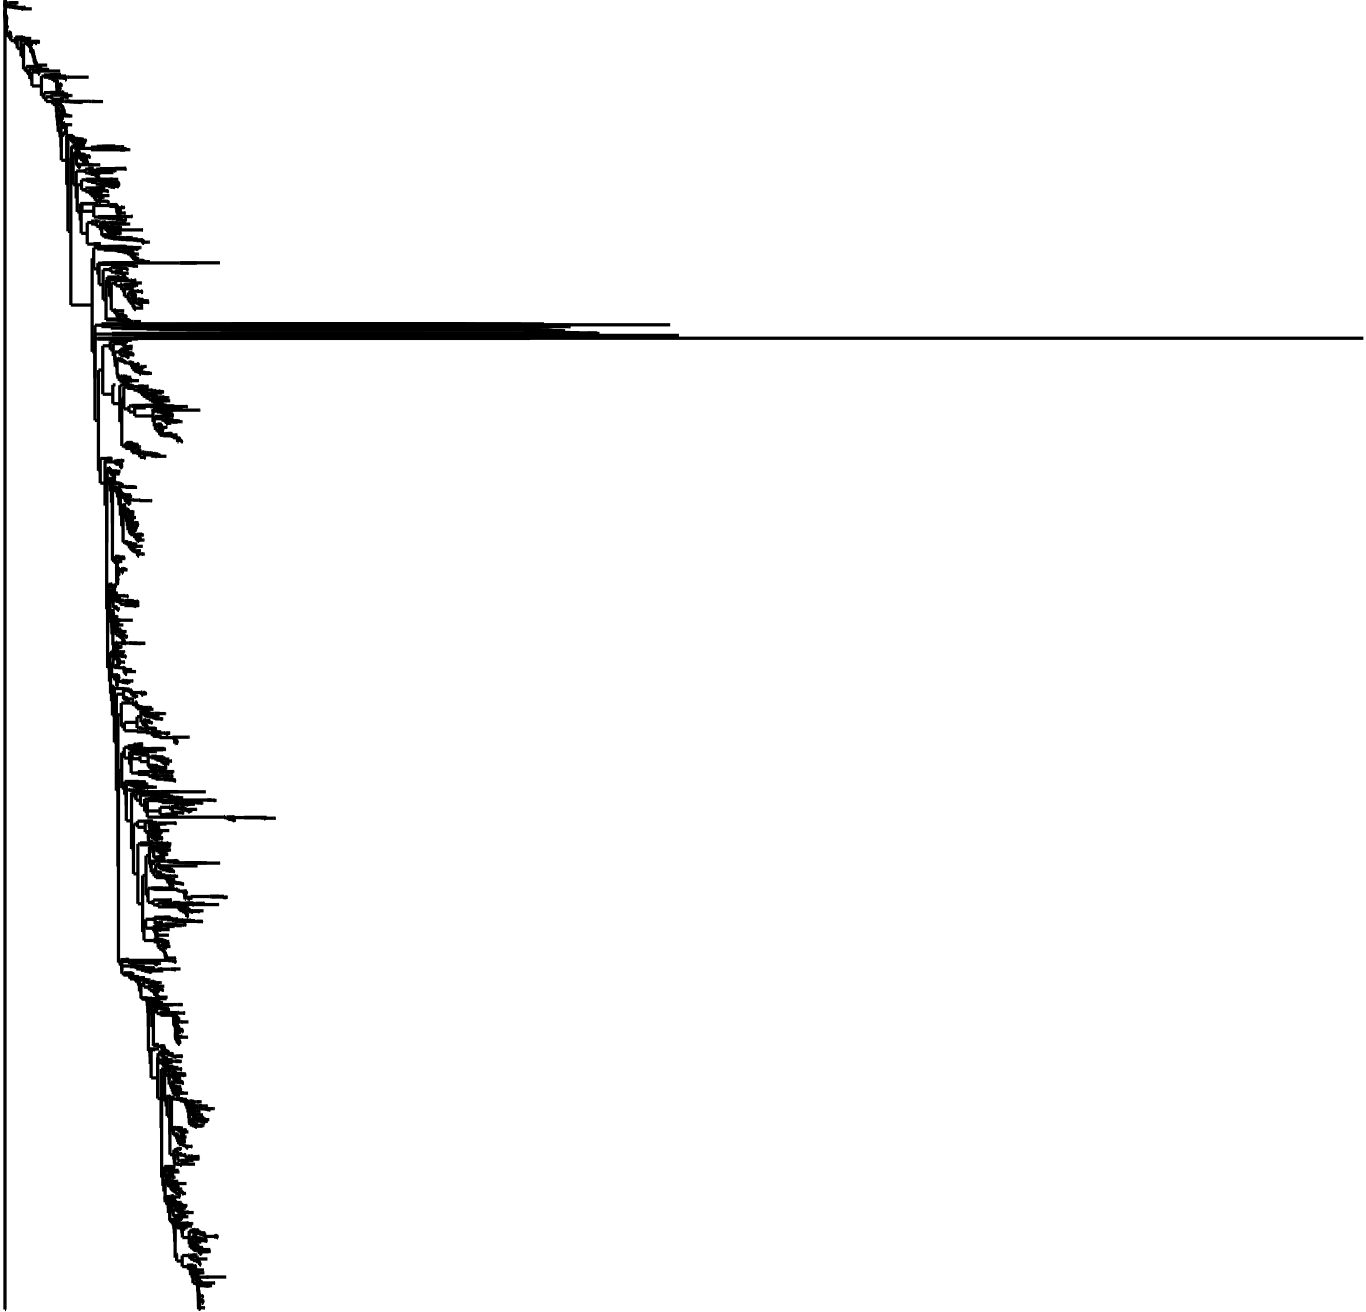

cln\_iqtree

# Vangay filtered IQTREE

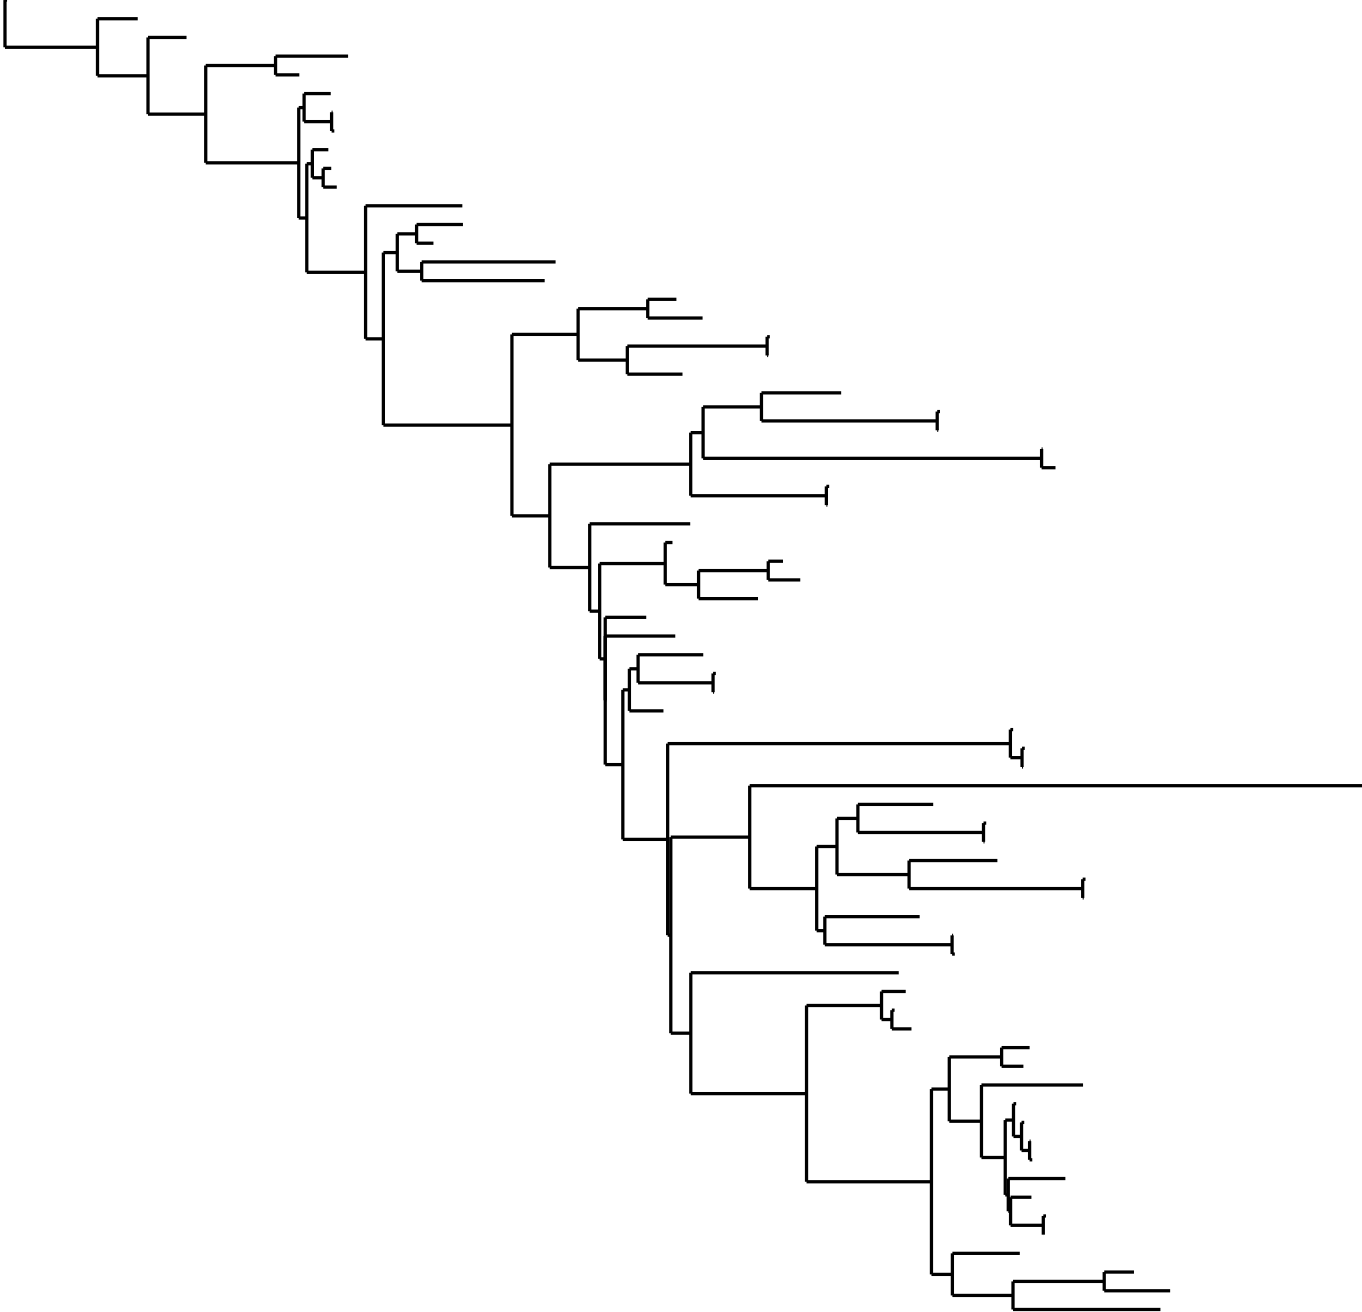

orig\_ref

# Noguera-Julian Silva LTP

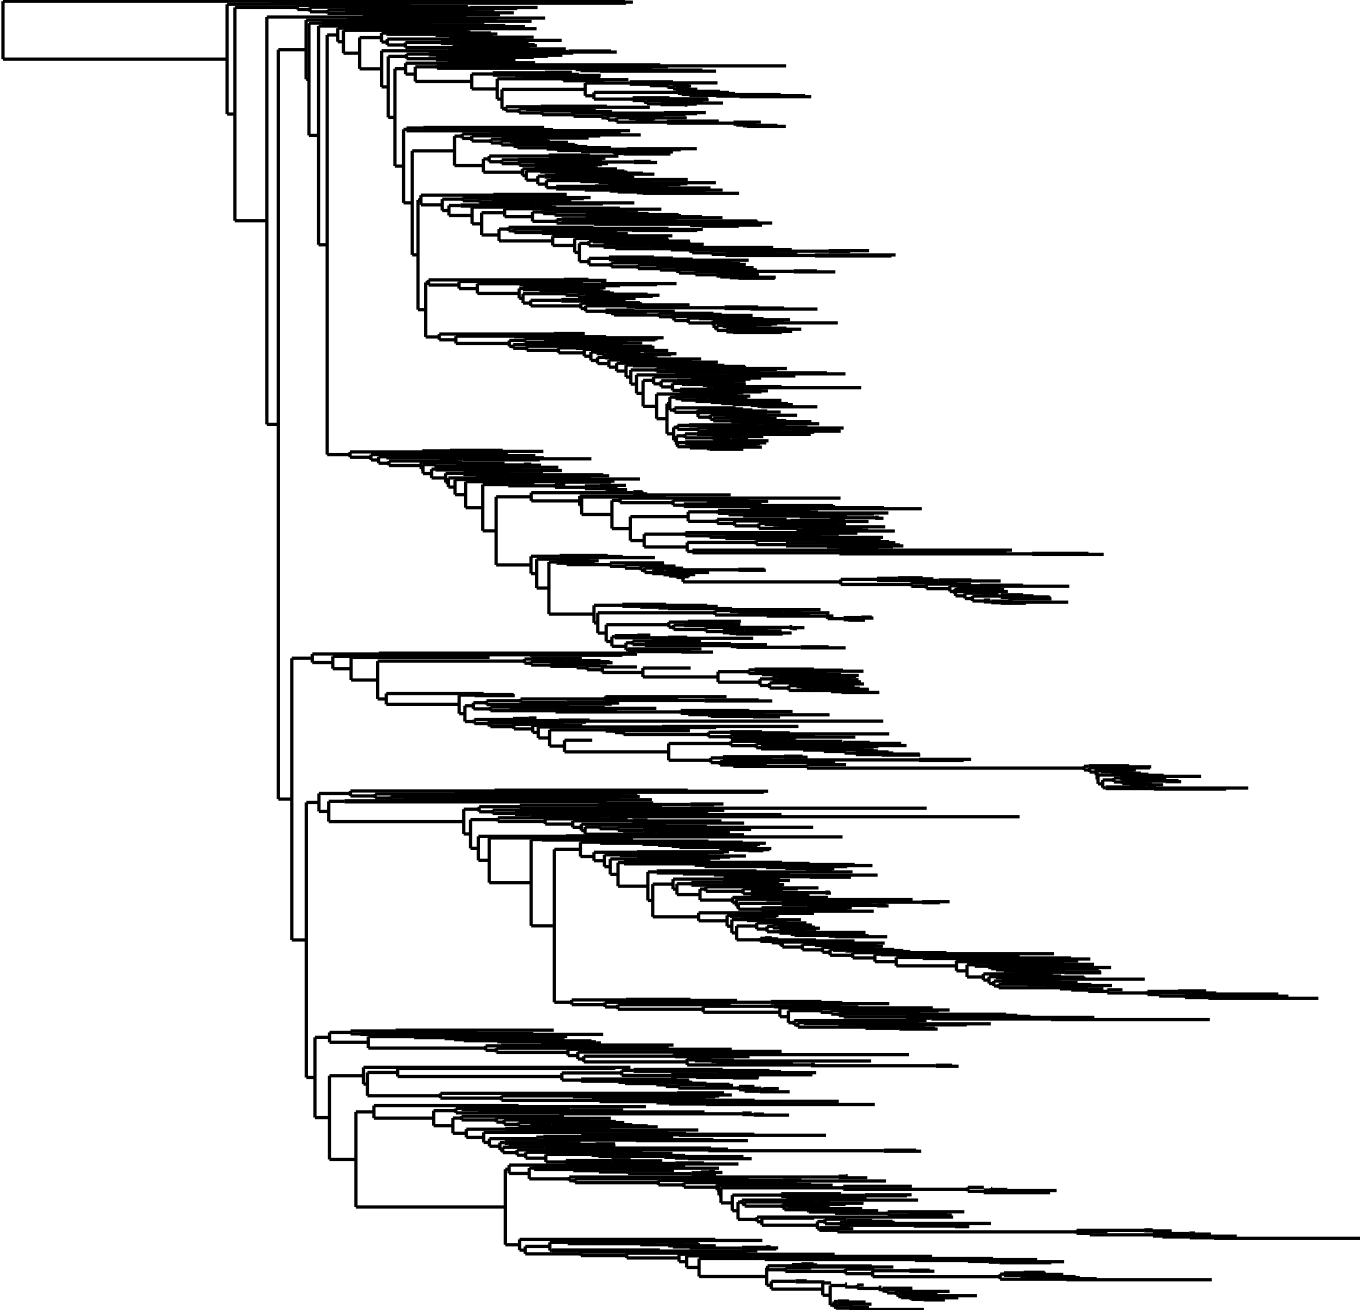

cln\_ref

# Noguera-Julian filtered Silva LTP

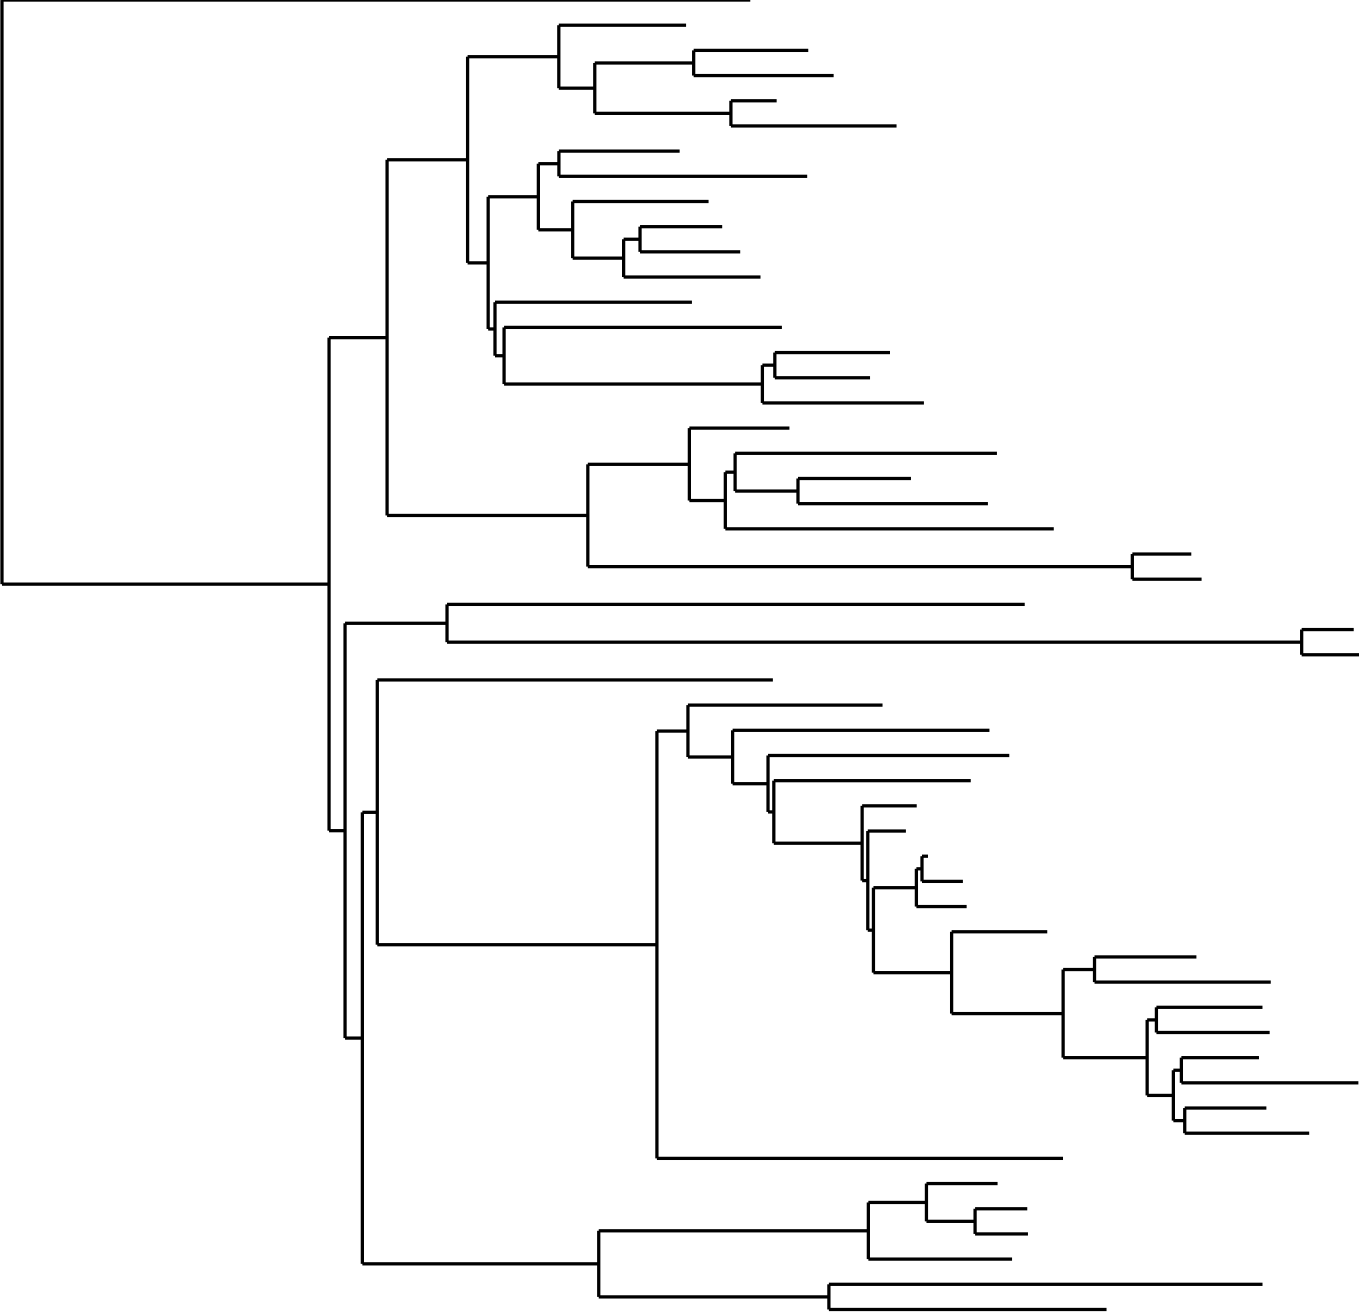

orig\_upgma

# Noguera-Julian UPGMA

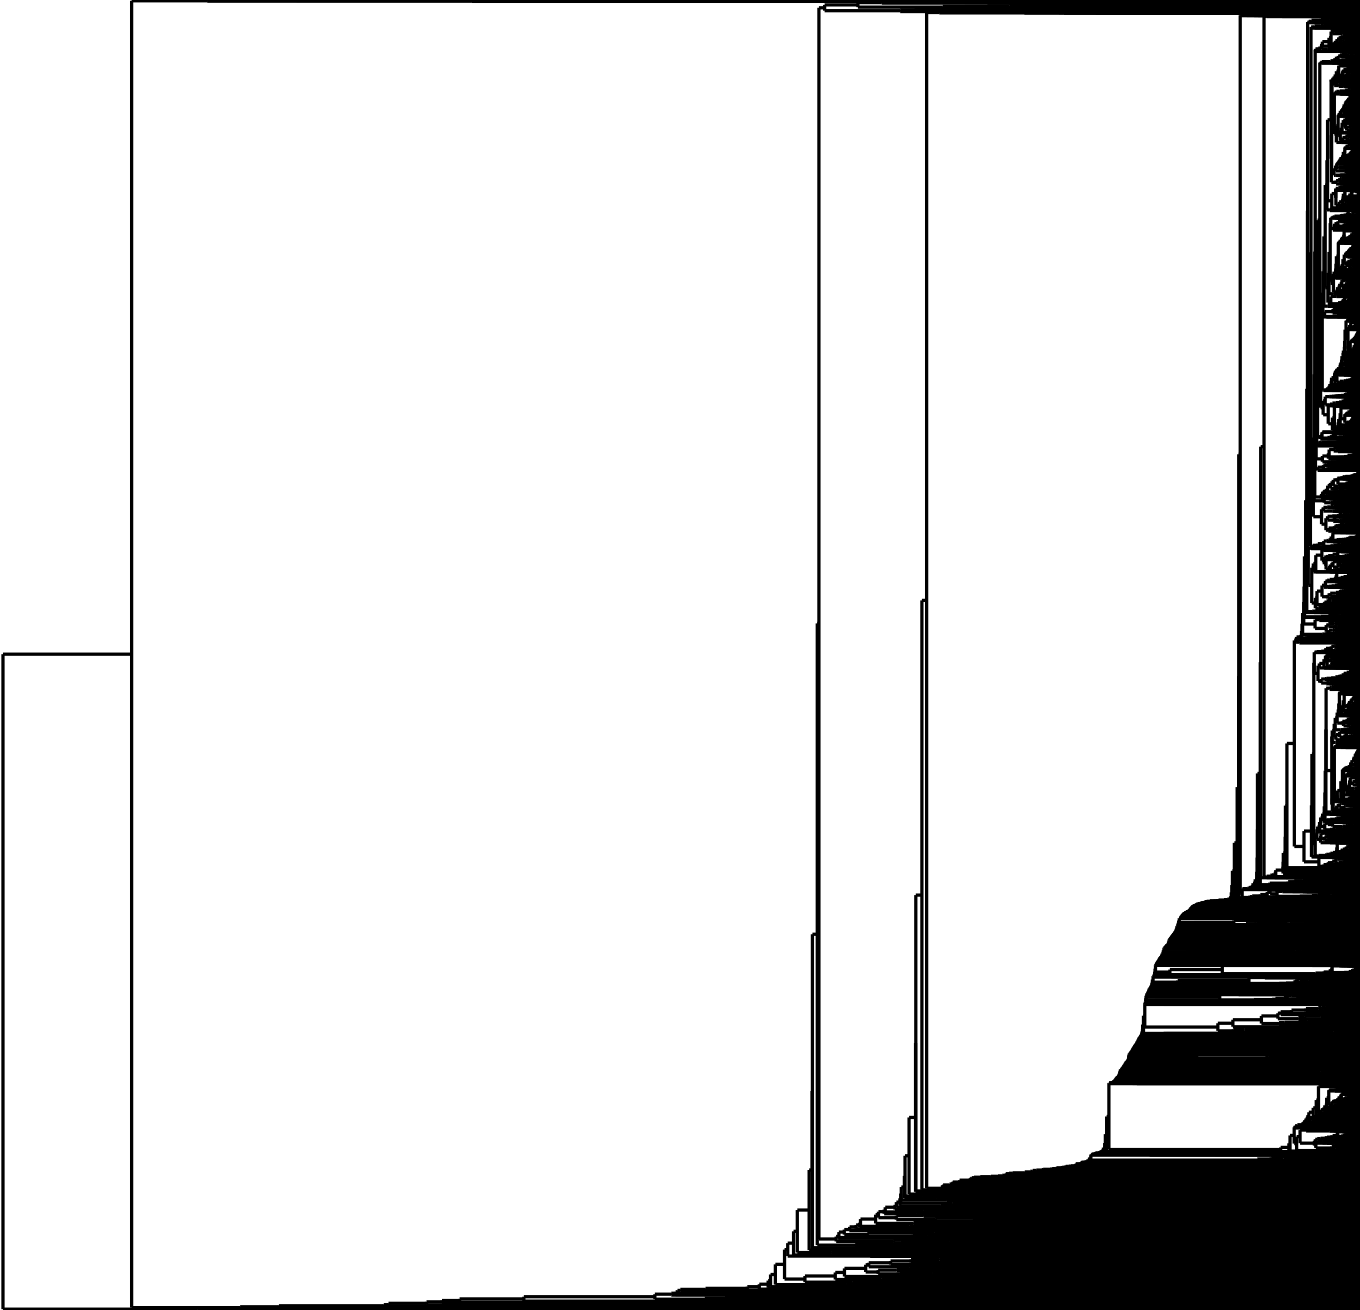

cln\_upgma

# Noguera-Julian filtered UPGMA

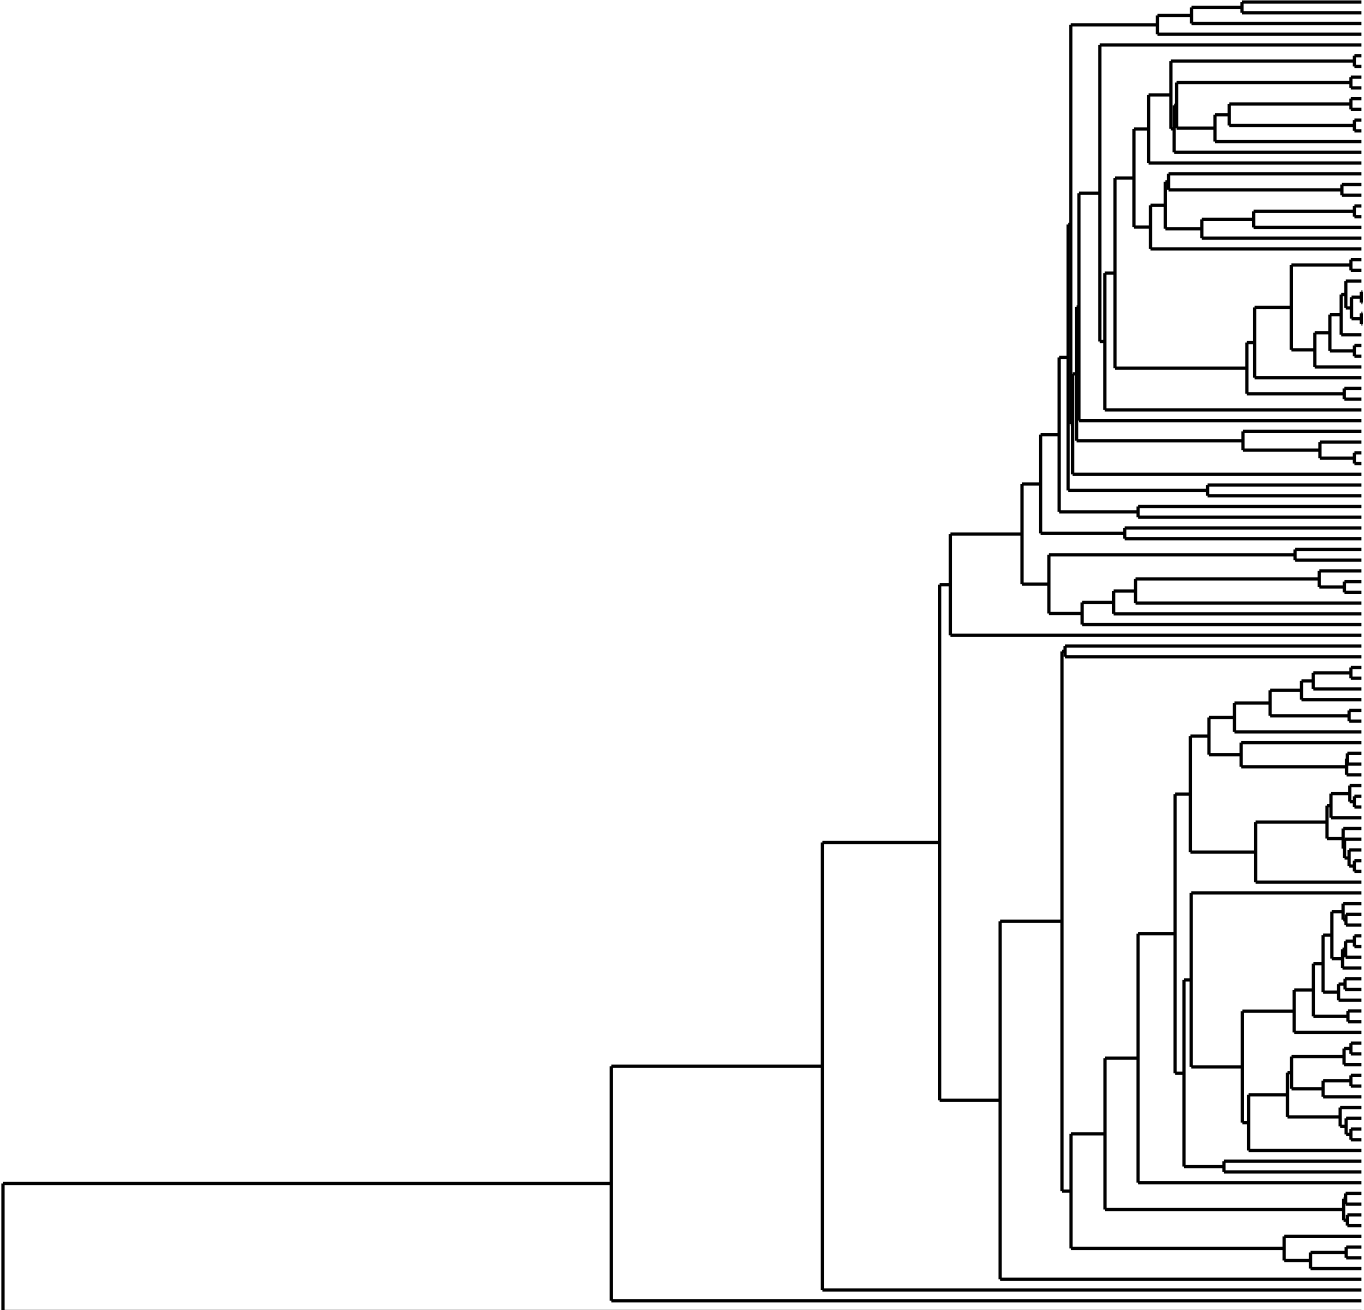

orig\_iqtree

# Noguera-Julian IQTREE

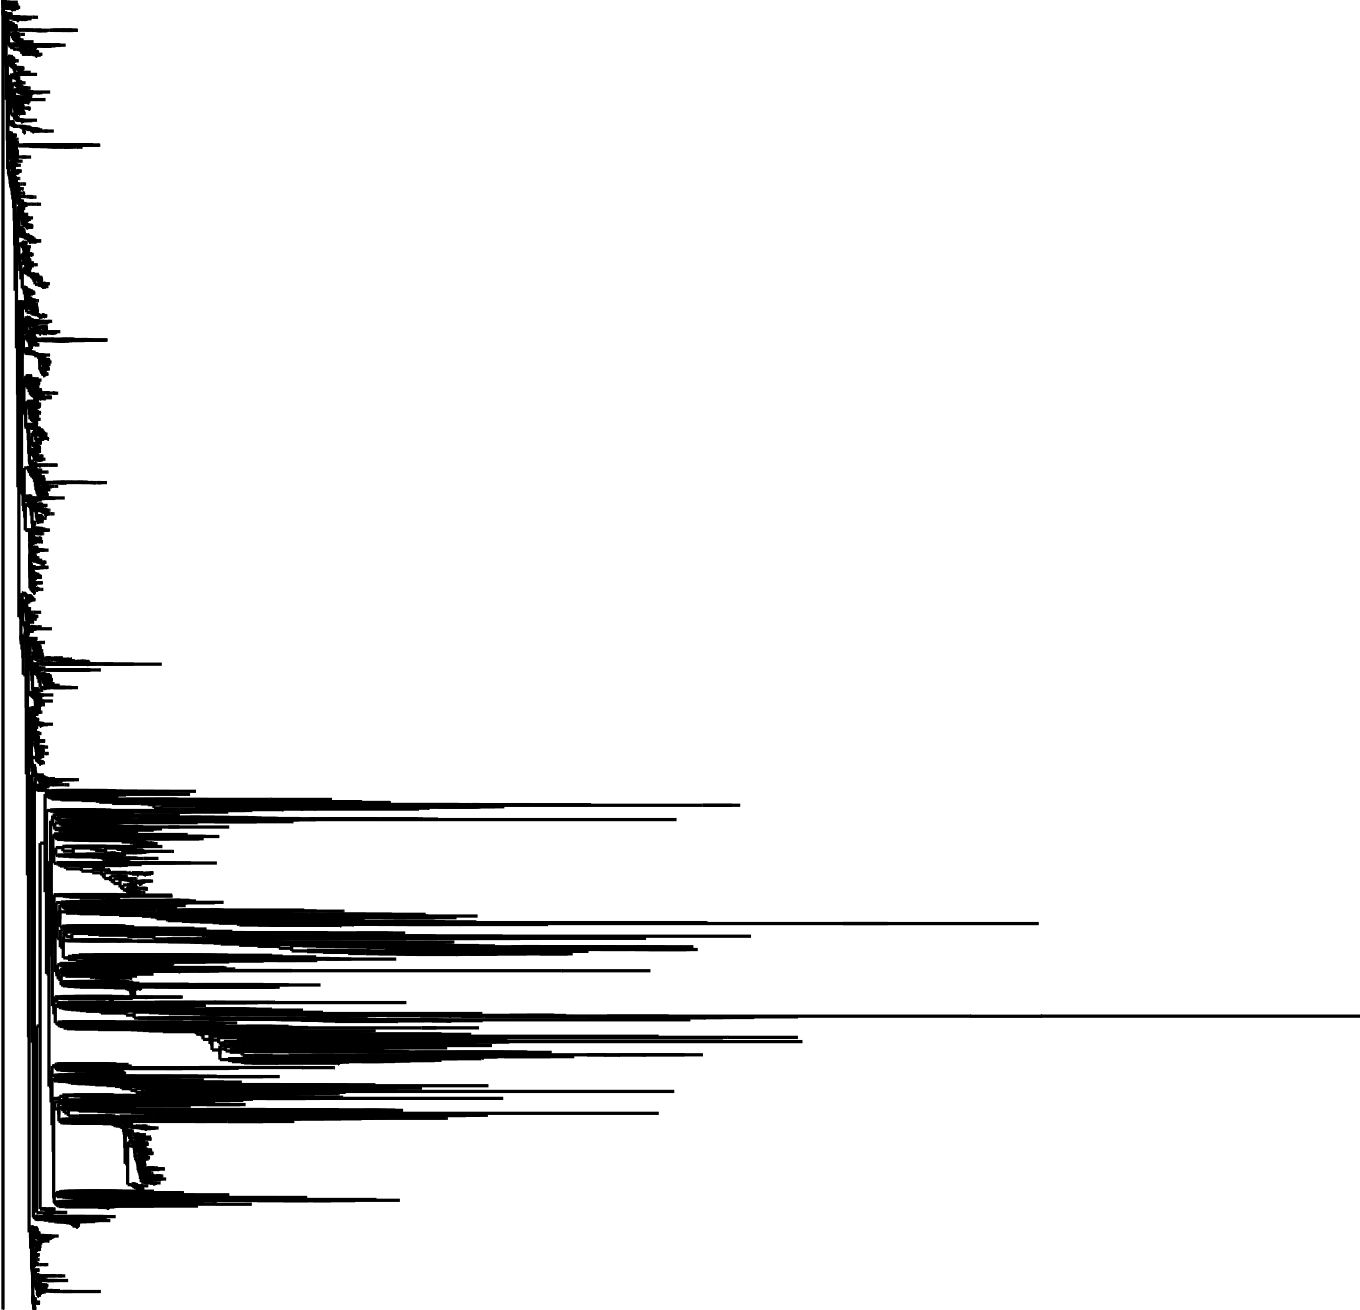

cln\_iqtree

Noguera-Julian filtered IQT

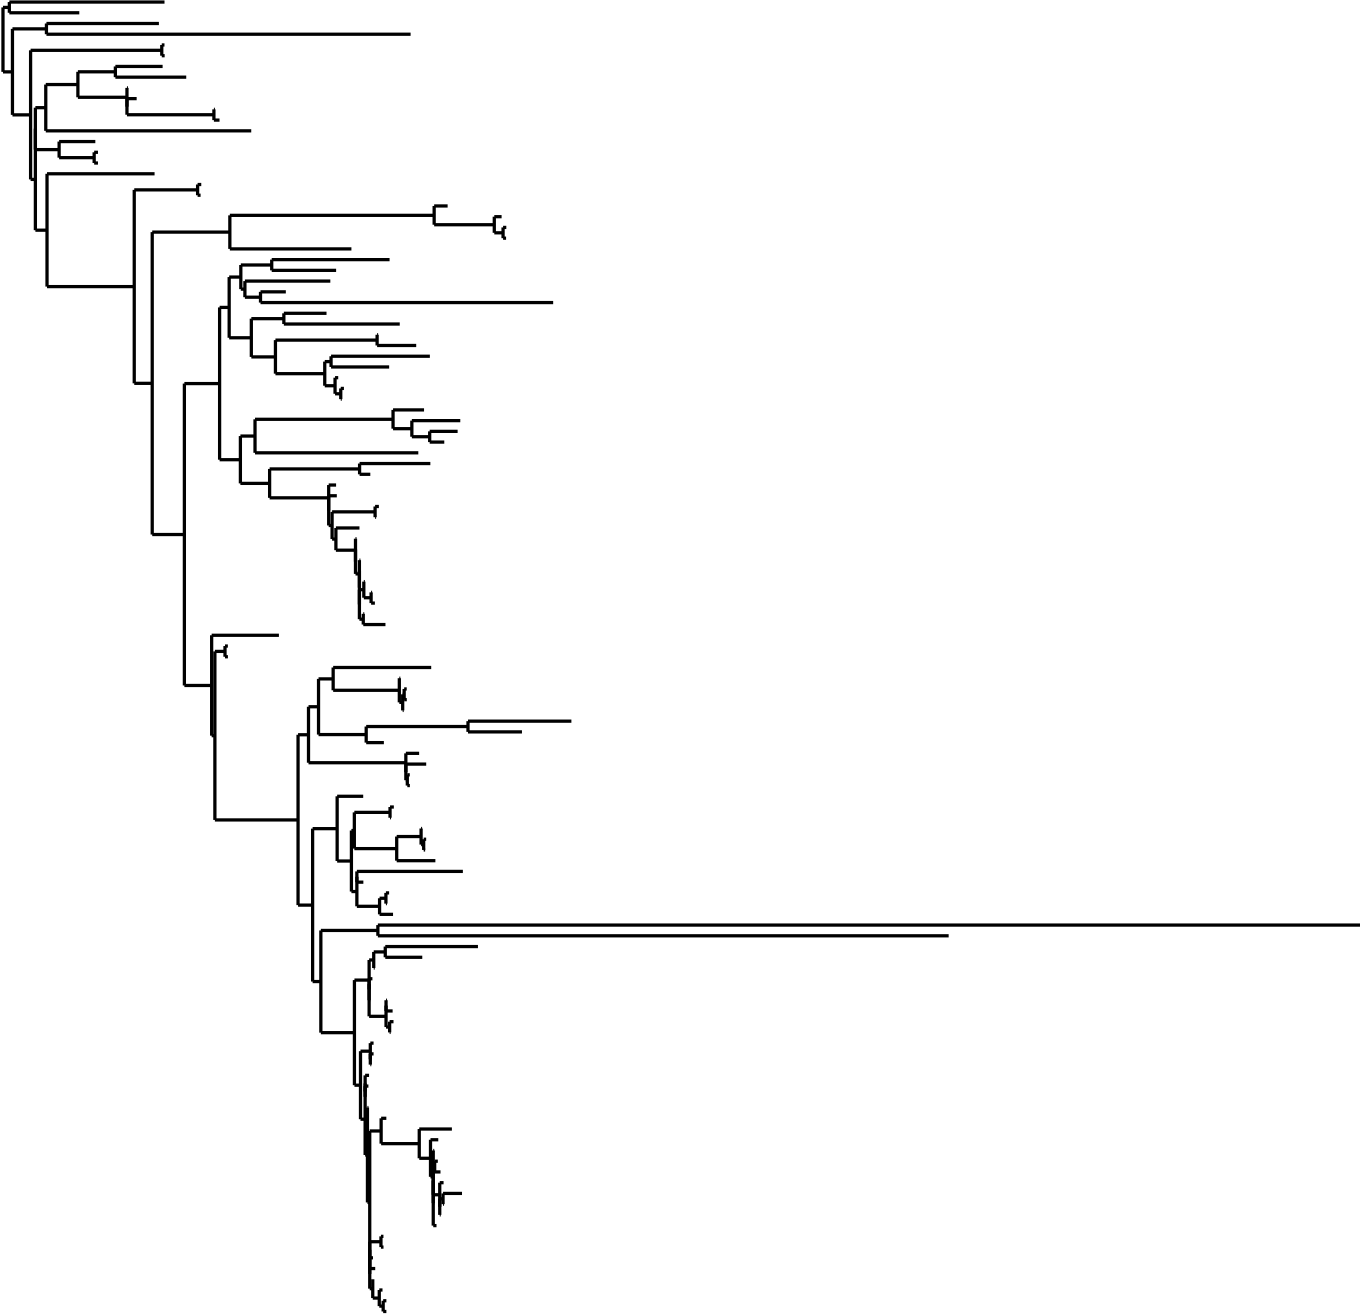

Supplement: 40168_2023_1747_MOESM1_ESM.pdf [file 40168_2023_1747_MOESM1_ESM.pdf]
